1 **Control of G2 phase duration by CDC25B modulates the switch from direct to indirect**  
2 **neurogenesis in the neocortex**

3 Mélanie Roussat, Thomas Jungas, Christophe Audouard, Francois Medevielle, Alice Davy,  
4 Fabienne Pituello, Sophie Bel-Vialar\*

5 1 - Molecular, Cellular and Developmental biology department (MCD), Centre de Biologie  
6 Integrative (CBI), University of Toulouse, CNRS, UPS, 31062 Toulouse, France

7 \* Corresponding author

8 Abbreviated title: CDC25B, G2 phase and cortical neurogenesis **G2 mediated function of**  
9 **CDC25B during corticogenesis**

10

11 Corresponding author: Sophie Bel-Vialar,

12 E-mail addresses: [sophie.vialar@univ-tlse3.fr](mailto:sophie.vialar@univ-tlse3.fr)

13 The authors declare no competing financial interests.

14 Acknowledgments: This work was supported by the Centre National de la Recherche  
15 Scientifique and Université P. Sabatier de Toulouse. Melanie roussat was funded by the  
16 Ministère de L'Enseignement Supérieur et de la Recherche (MESR). We thank Eric Agius and  
17 Valerie Lobjois for fruitful discussions. We thank Myriam Roussigné, Elise Cau, Mohamad  
18 Fawal for critical reading of the manuscript.

19 Keywords: neural stem cells, neurogenesis, proliferation, differentiation, cell cycle, CDC25  
20 phosphatases, neocortex, vertebrate embryo

21

22 Abstract

23 During development, cortical neurons are produced in a temporally regulated sequence from  
24 apical progenitors, directly, or indirectly through the production of intermediate basal  
25 progenitors. The balance between these major progenitors' types is determinant for the  
26 production of the proper number and types of neurons and it is thus important to decipher  
27 the cellular and molecular cues controlling this equilibrium. Here we address the role of a cell  
28 cycle regulator, the CDC25B phosphatase, in this process. We show that deleting CDC25B in  
29 apical progenitors leads to a transient increase of the production of TBR1+ neurons at the  
30 expense of TBR2+ basal progenitors in mouse neocortex. This phenotype is associated with  
31 lengthening of the G2 phase of the cell cycle, the total cell cycle length being unaffected. Using  
32 *in utero* electroporation and cortical slice cultures, we demonstrate that the defect in TBR2+  
33 basal progenitor production requires interaction with CDK1 and is due to the G2 phase  
34 lengthening in CDC25B mutants. Altogether, this study identifies a new role for CDC25B and  
35 the length of the G2 phase in direct versus indirect neurogenesis at early stages of the cortical  
36 development.

37

## 38 Introduction

39 During mammalian brain development, neural progenitor cells (NPCs) undergo precise  
40 sequential transitions that will define the number and type of neurons that will compose the  
41 neocortex (Kawaguchi 2019). It is therefore important that the proliferation and  
42 differentiation rates of these progenitors are tightly regulated during neurogenesis to avoid  
43 dramatic cortical defect such as microcephaly in human (Barbelanne and Tsang 2014).

44 At the onset of corticogenesis, NPCs initially divide symmetrically to expand the stem cell pool  
45 before giving rise to apical dividing progenitors (Govindan and Jabaudon 2017). Apical radial  
46 glial cells (aRGs) are located in the ventricular zone (VZ) and express Pax6. They first divide  
47 symmetrically and then shift to an asymmetric self-renewing division, producing an aRG and,  
48 either a neuron (direct neurogenesis) or a basal intermediate progenitor (bIP) expressing Tbr2.  
49 Basal progenitors divide once to produce two neurons (indirect neurogenesis) (Govindan and  
50 Jabaudon 2017, Kawaguchi 2019). Another type of basal progenitors, basal radial glia (bRG,  
51 also called outer radial glia), has emerged during evolution and is present in very small  
52 proportion in rodents in the SVZ and IZ. Like aRGs, they express Pax6 and have the capacity  
53 to perform several rounds of symmetric amplifying divisions (Ostrem, Di Lullo and Kriegstein  
54 2017, Namba and Huttner 2017). All these progenitors sequentially produce the different  
55 types of projection neurons that will colonise the six layers of the adult neocortex (Kawaguchi  
56 2019). The temporal transitions from one type of progenitor to another are therefore key  
57 parameters in controlling the size and functionality of the adult neocortex (Wilsch-Bräuninger,  
58 Florio and Huttner 2016).

59 Cell cycle kinetics and in particular cell cycle phase duration, is of major importance for  
60 controlling these transitions (Dehay and Kennedy 2007, Agius et al. 2015). Several studies  
61 showed that G1 lengthening is an important positive regulator of neuronal differentiation, G1-  
62 phase lengthening being associated with the transition from aRGs to bIPs during  
63 corticogenesis (Lange, Huttner and Calegari 2009, Pilaz et al. 2009, Arai et al. 2011). In  
64 addition it has been shown that proliferating and neurogenic progenitors display different S  
65 phase duration, the latter having a shorter S phase (Arai et al. 2011). Mitosis lengthening has  
66 also been linked to an increase in neurogenic divisions (Pilaz et al. 2016). However, even if  
67 correlations have been made in different organs between the duration of G2 phase and cell

68 fate (Locker et al. 2006, Agathocleous et al. 2007, Gonzales and Liang 2015, Gonzales et al.  
69 2015); the importance of controlling G2 length during neurogenesis remains poorly  
70 documented.

71 Few years ago, we have shown that the CDC25B phosphatase, a master regulator of mitosis  
72 entry, is expressed in neural progenitors and favours neurogenesis in the developing spinal  
73 cord (Benazeraf et al. 2006, Peco et al. 2012, Bonnet et al. 2018). CDC25B is a well-known  
74 G2/M regulator, belonging to the dual specificity CDC25 phosphatase family that activates  
75 CDK1-cyclinB complexes thus promoting mitosis entry (Boutros, Dozier and Ducommun 2006).  
76 It is also recruited to the mother centrosome and is involved in the centrosome duplication  
77 cycle as well as in microtubule nucleation (Boutros, Lobjois and Ducommun 2007, Boutros and  
78 Ducommun 2008, Boutros et al. 2011, Boutros et al. 2013). In the neural tube, CDC25B  
79 controls the G2 phase duration of neural progenitors, favours neurogenic division at the  
80 expenses of proliferative ones and, part of this function is independent of its interaction with  
81 CDK1 (Peco et al. 2012, Bonnet et al. 2018). CDC25B thus allows progenitors maturation during  
82 spinal neurogenesis. It remains an open question whether this phosphatase can be considered  
83 a general player in neuronal maturation and whether regulation of the duration of the G2  
84 phase has a role to play in this process.

85 In this study, we investigated the role of CDC25B in corticogenesis. Using a conditional CDC25B  
86 knockout mouse line, we show that CDC25B loss of function in apical progenitors leads to a  
87 transient imbalance in neuronal and basal intermediate progenitors production, accompanied  
88 with a strong lengthening of the G2 phase. We provide evidence that this change in G2  
89 duration in apical progenitors is causing the switch in fate, producing neurons instead of basal  
90 intermediate progenitors. This study sheds light on an important role of CDC25B and G2 phase  
91 modulation for controlling the fate of apical progenitors thus impacting the switch between  
92 direct to indirect neurogenesis.

## 93 **Results**

### 94 ***Cdc25b* is expressed in apical progenitors**

95 To determine if *Cdc25b* is expressed in all cortical progenitors or in a subset of them, we  
96 performed *in situ* hybridization on brain coronal sections at key stages of corticogenesis  
97 **(Figure 1A)**.

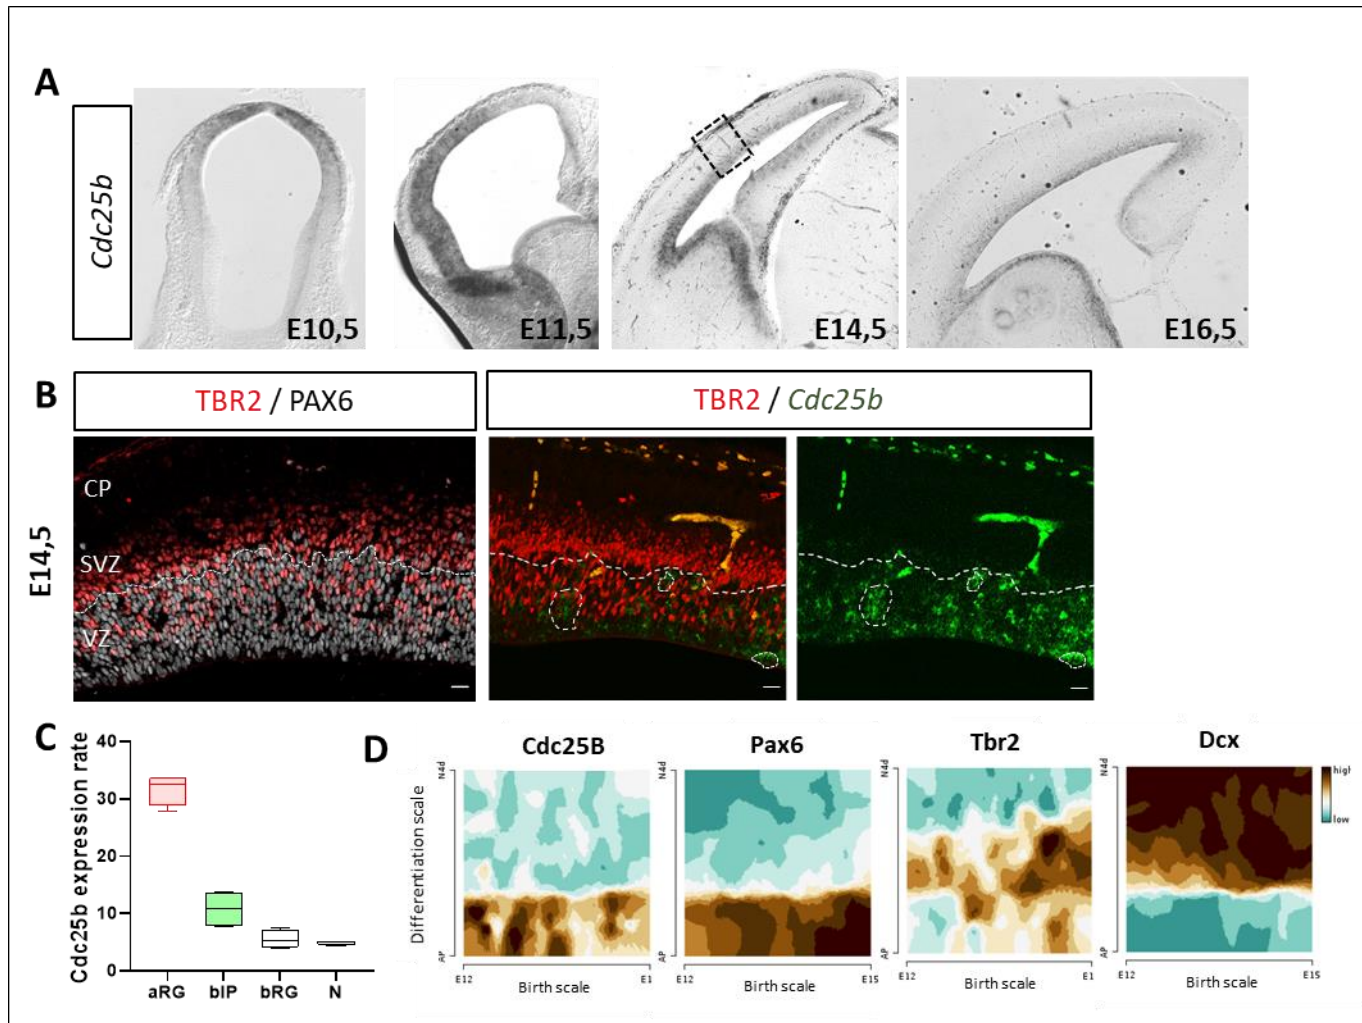

**Figure 1: *Cdc25b* expression pattern during corticogenesis.** *Cdc25b* is expressed in aRGs progenitors (PAX6+ in the VZ) and progressively downregulated in basal progenitors (TBR2+). **A**, *Cdc25b* in situ hybridization on mouse embryo coronal sections at E10.5, E11.5, E14.5 and E16.5. **B**, PAX6 and TBR2 immunostaining and co-staining of *Cdc25b* (in situ hybridization) and TBR2 expression (immunofluorescence) on E14.5 coronal brain sections. **C-D**, Quantification of *CDC25B* transcripts in progenitors and neurons using bulk RNA-Seq data from Florio et al.2015 (C) and Single-cell RNA-Seq from Telley et al 2019 using the gene browser at <http://genebrowser.unige.ch/telagirdon/> (D).

98

99 *Cdc25b* is detected in neuroepithelial cells from E10.5. At E11.5, *Cdc25b* is expressed in the  
 100 ventricular zone (VZ) in a graded manner: it is highly expressed laterally but at low level  
 101 medially, its level of expression following the neuronal production gradient. At E14.5 and  
 102 E16.5, it still appears restricted to the ventricular zone, that contains PAX6+ apical progenitors  
 103 (aRGs) and TBR2+ newborn basal progenitors (bIPs) (**Figure 1A**). To determine if it is also  
 104 expressed in the subventricular zone (SVZ), we performed immunostaining for TBR2 following  
 105 in situ hybridization of *Cdc25b* transcripts at E14.5. We observed that *Cdc25b* is not expressed

106 in the SVZ, which contains TBR2+ bIPs, and that the TBR2+ cells in the VZ (newborn bIPs, Arai  
107 et al.2011) do not overlap with *Cdc25b*-expressing cells either (**Figure 1B**). To confirm this  
108 observation, we analysed published bulk RNA-Seq data from E14.5 samples (Florio et al. 2015)  
109 and scRNA-Seq data from E12 to E15 cortices (Telley et al. 2019). This data mining confirmed  
110 that *Cdc25b* is highly expressed in aRGs, barely in bIPs and is not expressed in bRGs and  
111 neurons (**Figure 1C,D**). In addition, its expression appears to be most intense at early stages,  
112 when most bIPs cells are produced. Overall, these analyses indicate that in the developing  
113 cortex, *Cdc25b* is expressed gradually as neuronal production progresses and that it is  
114 predominantly expressed in aRGs, progressively extinguished in bIPs, and absent in neurons.

### 115 ***Cdc25b* deletion transiently leads to increased neuronal differentiation and decreased basal** 116 **progenitor production**

117 Having determined that *Cdc25b* expression is restricted to the apical progenitors, we next  
118 investigated its function during the early phases of corticogenesis in *Cdc25b<sup>fl/fl</sup> ; NestinCre*  
119 (*CDC25B<sup>CKO</sup>* or *CKO*) *embryos* in which *Cdc25b* expression is specifically extinguished in neural  
120 progenitor cells from the onset of neurogenesis (Bonnet et al. 2018). In these embryos,  
121 deletion is complete in the cortex from E10.5 (Madisen et al. 2010) and at E14.5, *Cdc25b*  
122 expression is abolished in the whole brain (**Figure 2A**). We first measured cortical hemispheres  
123 size and cortical plate thickness at postnatal stage (P0) and did not observed any gross  
124 difference in *CDC25B<sup>CKO</sup>* embryos at these stages (**Figure 2B,C**), suggesting that the number of  
125 neurons is unchanged. We then checked the production of different types of neurons over  
126 time. TBR1, CTIP2 and SATB2 expressing neurons are sequentially produced between E12.5  
127 and E16.5 (Molyneaux et al. 2007, Vasistha et al. 2015). At E13.5, the majority of neurons  
128 express TBR1. In *CDC25B<sup>CKO</sup>*, the number of TBR1+ neurons is transiently increased in the most  
129 lateral part of the cortical plate at E13.5 (**Figure 2D,E**). This increase is no longer significant at  
130 E14.5 (**Figure 2F,G**). We then checked CTIP2+ and SATB2+ neurons at E14.5 and found that  
131 their production occurs normally at this stage in *CDC25B<sup>CKO</sup>* (**Figure 2H,I,J**). At E15.5 and E16.5,  
132 no difference is observed in the number of TBR1+, CTIP2+ or SATB2+ neurons (**Figure 2-figure**  
133 **supplement 1**). These results indicate that in *CDC25B<sup>CKO</sup>*, neuronal production is transiently  
134 increased at E13.5 but this is compensated at later stages.

135

136

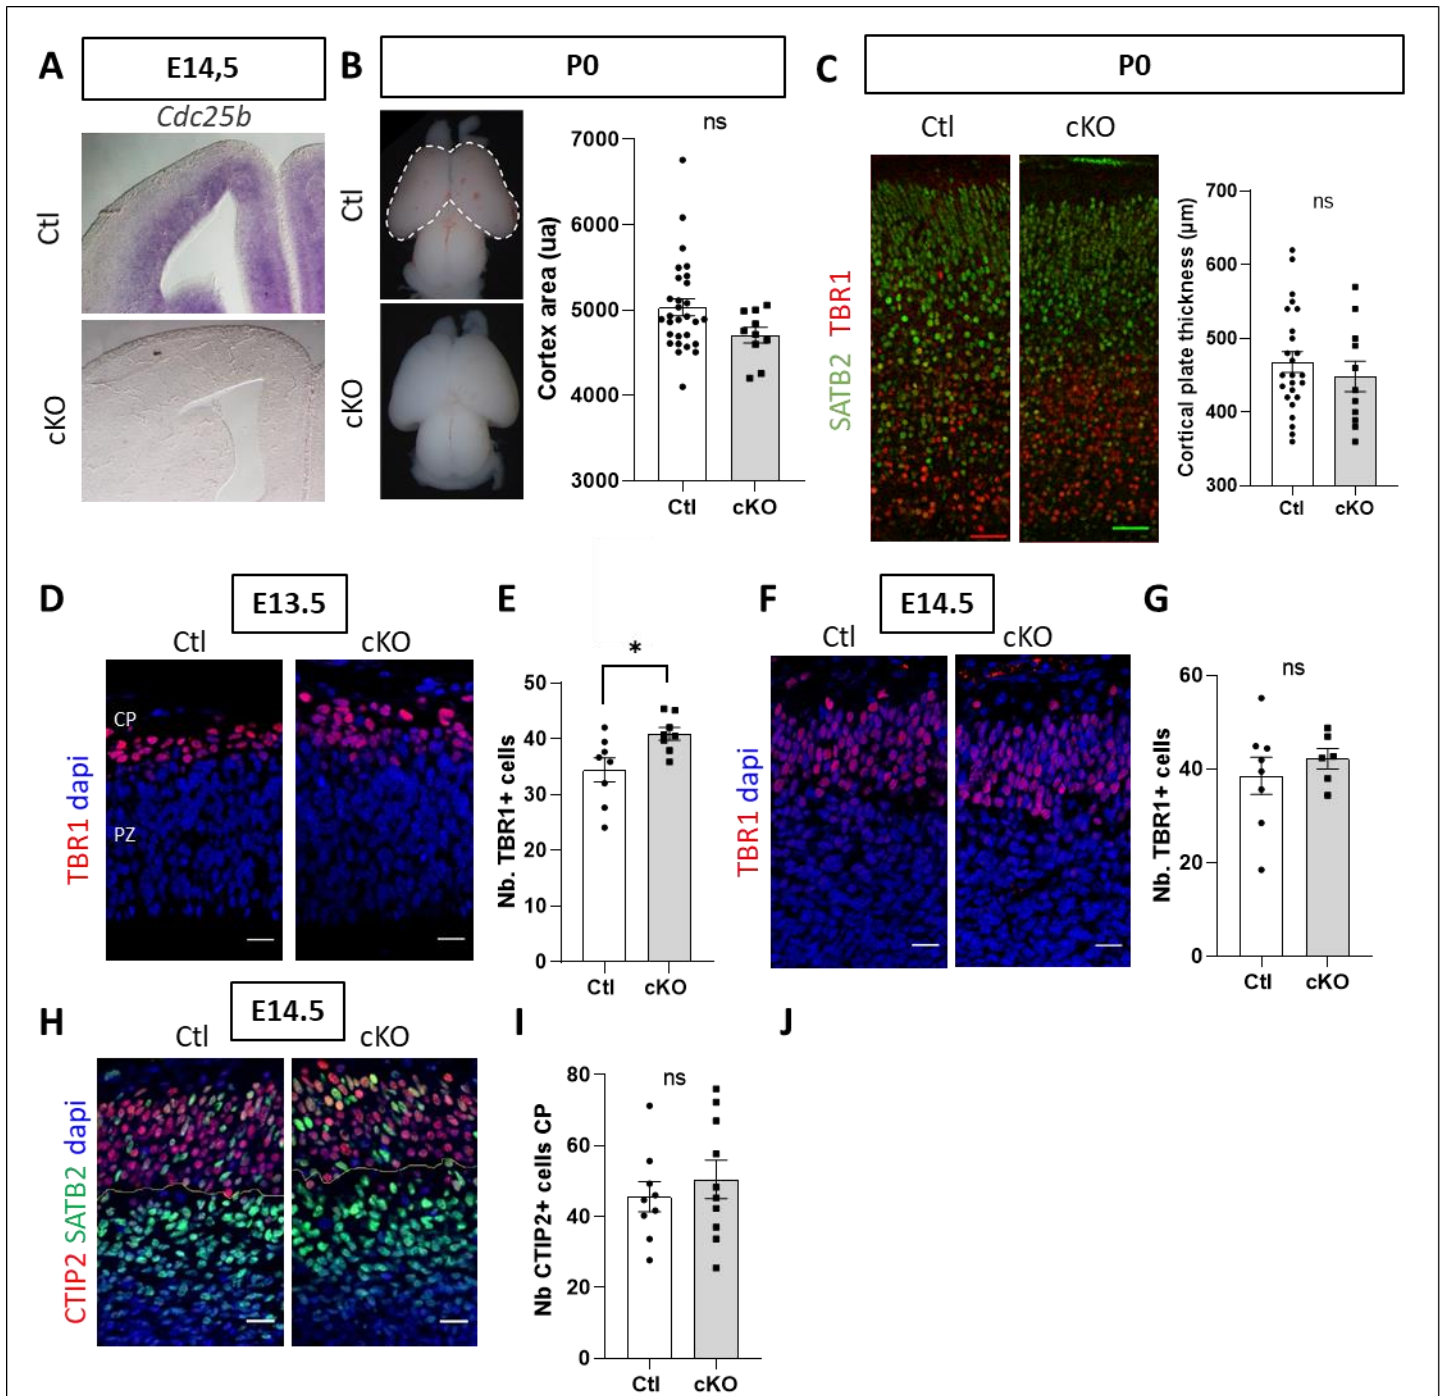

**Figure 2: CDC25B loss-of-function triggers a transient increase of neuronal differentiation**

**A**, *Cdc25b* in situ hybridization at E14.5 on control (Ctl) and *Cdc25b* cKO (cKO) embryo coronal sections. **B**, Cortical area (white dotted line) measurement in Ctl and cKO embryos at P0. Each point represents the cortex area in arbitrary unit (ua) for one embryo. Mann-Whitney t-test. Ctl n=29, cKO n=10 **C**, Cortical plate thickness measurement, delimited by SATB2<sup>+</sup> and TBR1<sup>+</sup> immunostaining on coronal brain sections of Ctl and cKO embryos at P0. Each point represents the value for one embryo. Mann-Whitney t-test. Ctl n=25, cKO n=11 **D**, **F**, TBR1 immunostaining on coronal sections at E13.5 (**D**) and E14.5 (**F**). Nuclei are stained with dapi (blue nuclei). **E**, **G**, Quantification of TBR1 neurons in the cortical plate (red nuclei) at E13.5 (**E**) and E14.5 (**G**). Each point is the mean value of 3 sections/embryo. Mann-Whitney t-test and mixed model. E13.5 n=9-10, \*p<0.05; E14.5 n=6-8 **H**, CTIP2 (red nuclei) and SATB2 (green nuclei) immunostaining on coronal sections at E14.5, Nuclei are stained with dapi (blue nuclei). **I**, **J**, Quantification of CTIP2 (**I**) and SATB2 neurons (**J**) in the cortical plate at E14.5. Each point is the mean value of 3 sections/embryo. Mann-Whitney t-test and mixed model. CTIP2 n= 9-10 ; SATB2 n=16. ns. Non significant. CP= cortical plate, PZ=progenitor zone, IZ=intermediate zone. Scale bars represent 70 µm.

138 Increased neuronal numbers at E13.5 could be due to an enhanced production of neurons  
139 from apical progenitors or to a premature differentiation of basal intermediary progenitors.  
140 To get insight on the dynamic of progenitor production in the CDC25B<sup>CKO</sup> we examined aRGs  
141 distribution (PAX6+ cells in the VZ and SVZ), bIP cells production (TBR2+ newborn cells in the  
142 VZ) and bIP accumulation (TBR2+ cells that have migrated in the SVZ), between E12.5 and  
143 E16.5 (**Figure 3**). The number of aRGs is not significantly affected at any of the 4 stages  
144 analyzed in CDC25B<sup>CKO</sup> embryos (**Figure 3B,E,H,K**) and they are correctly located in the VZ  
145 (**Figure 3A,D,G,J**). At E14,5 the number of bIP is decreased in the VZ (**Figure 3G,I**). 48 hours  
146 later, the number of bIPs has returned to normal in the VZ but is now decreased in the SVZ  
147 (**Figure 3J,L**). We also quantified PAX6+ cells in the IZ at E14.5 and E16.5 (**Figure 3M,N,O**) that  
148 are likely to be bRGS (Wang et al. 2011). The number of PAX6+ cells in the IZ is similar in Ctl  
149 and CDC25B<sup>CKO</sup> at E14.5 (**Figure 3N**) but is increased at E16.5 (**Figure 3N,O**).

150 To consolidate these data, we also quantified the total number of PAX6+ and TBR2+ cells in  
151 Control (Ctl) and CDC25B<sup>CKO</sup> cortices using cytometry (Jungas et al. 2020). While the total  
152 number of PAX6+ cells is not modified, the number of TBR2+ cells is significantly reduced in  
153 CDC25B<sup>CKO</sup> at E14.5 confirming that bIP but not aRGs production is affected in CDC25B<sup>CKO</sup>  
154 (**Figure 3-figure supplement 1**). We verified that this reduction was not due to apoptosis by  
155 quantifying activated Caspase3+ cells in the progenitor zone at E13.5 and E16.5 and, observed  
156 no difference between Ctl and CDC25B<sup>CKO</sup> cortices. (**Figure 3-figure supplement 2A**). In  
157 addition, we quantified proliferation of bIPs (TBR2+ cells in VZ and SVZ) at E14.5 and found  
158 that proliferative and mitotic indexes were normal, ruling out that the reduced bIP number  
159 was due to a proliferation defect in these cells (**Figure 3-figure supplement 2 B,C,D**).

160 Altogether, these results indicate that the reduced number of basal progenitors in CDC25B<sup>CKO</sup>  
161 is most likely due to a reduction in their production from aRGs. This production defect is  
162 transient as the number of newborn TBR2+ cells in the VZ is not different from Ctl at E16.5.  
163 Altogether these results suggest that at E13.5, in absence of CDC25B, the progeny of aRGs is  
164 changed, from giving one aRG + one bIP to one aRG + one neuron . If this scenario is true, the  
165 balance between proliferative versus neurogenic division should not change in CDC25B<sup>CKO</sup> as  
166 all three types of division mentioned above are neurogenic divisions.



Figure 3

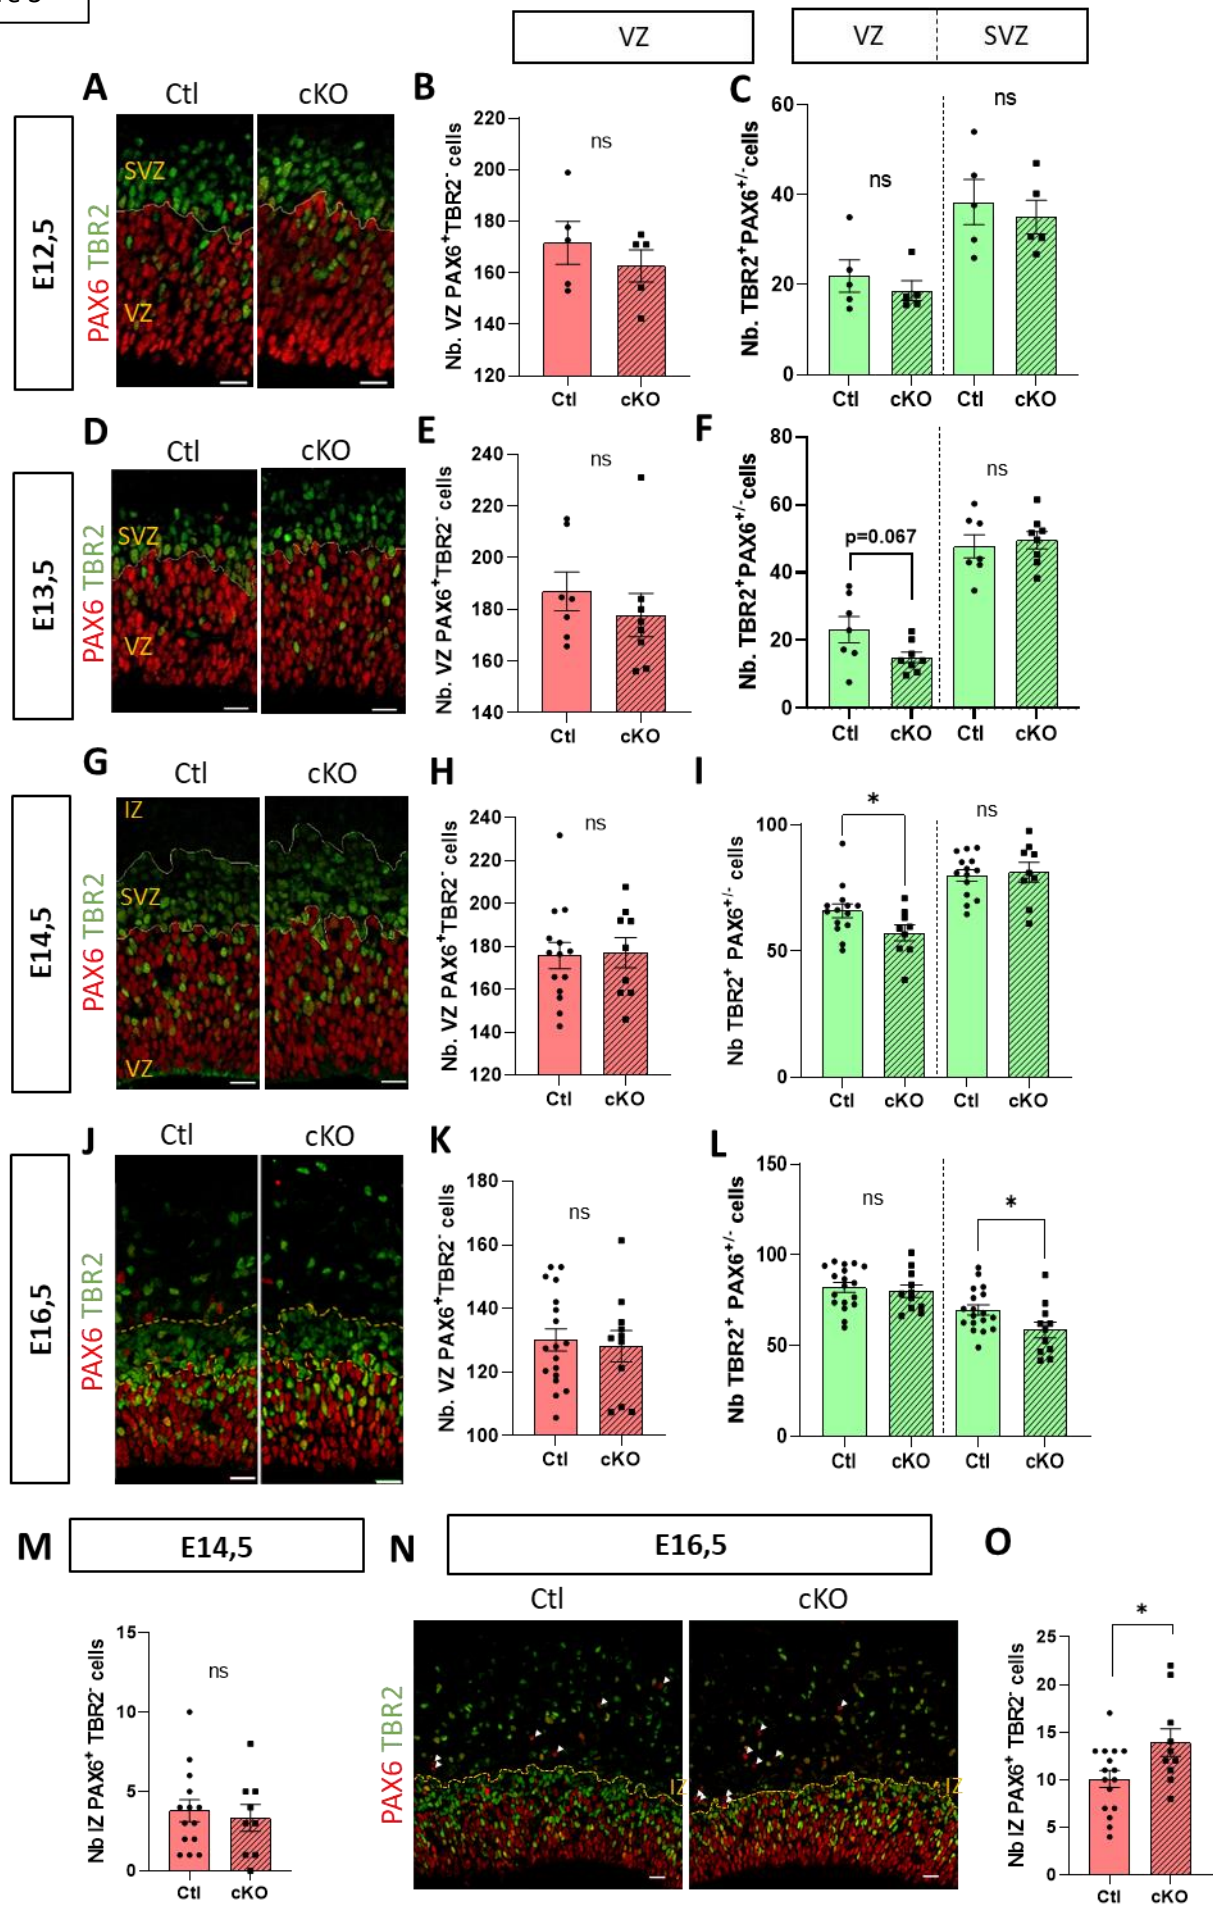

**Figure 3: Cdc25b loss-of-function impairs basal progenitors production. A, D, G, J, N** PAX6 and TBR2 immunostaining on E12.5 (A), E13.5 (D), E14.5 (G) and E16.5 (J) coronal brain sections, in Ctl and cKO embryos. **B-C, E-F, H-I, K-L**, Quantification of PAX6+ cells in the VZ (aRGs) and TBR2+ cells in the VZ and SVZ (bIPs) at E12.5 (B-C), n=5; E13.5 (E-F), n=7-8; E14.5 (H-I), n=9-14 or E16.5 (K-L), n=11-18 in Ctl and cKO embryos. Each point is the mean value of 3 sections/embryo. Mann-Whitney t-test and mixed model. **M, O**, Quantification of PAX6+ TBR2- cells in the intermediate zone (bRGs), at E14.5 (M), n=9-14 and E16.5 (O), n= 10-16 in Ctl and cKO embryos. Each point is the mean value of 3 sections/embryo. Mann-Whitney t-test and mixed model. \* p<0.05, \*\* p<0.01, ns. Non significant. VZ = ventricular zone, SVZ = sub ventricular zone, IZ = intermediate zone. Scale bars represent 20  $\mu$ m.

168

169 To assess this, we generated CDC25B<sup>CKO</sup> mice carrying a Tis21-GFP allele to distinguish aRGs  
170 committed to a neuronal or bIP fate (TIS21+) from self-expanding aRGs (TIS21-) (**Figure 3-**  
171 **figure supplement 3**) (Haubensak et al. 2004, Attardo et al. 2008). We did not detect any  
172 change in the number of TIS21-GFP cells among aRGs at E13.5 in CDC25B<sup>CKO</sup> compared to Ctl  
173 (**Figure 3-figure supplement 3**), confirming that CDC25B does not change the mode of division  
174 of aRGs from proliferative to neurogenic but rather influence the fate of neurogenic divisions.  
175 Overall, these analyses of neuron and progenitor production at several developmental stages  
176 indicate a transient increase in neuron production accompanied by a transient decrease in bIP  
177 production in CDC25B<sup>CKO</sup> embryos, with no change in aRG numbers. This suggests that in  
178 CDC25B<sup>CKO</sup>, aRGs transiently produce neurons instead of bIPs and that CDC25B controls the  
179 switch between direct versus indirect neurogenesis.

180

### 181 **The control of basal progenitor production by CDC25B requires CDK interaction**

182 We previously showed that CDC25B can act independently of CDK interaction and G2 phase  
183 regulation in the developing spinal cord (Bonnet et al. 2018). To test if its role in cortical  
184 neurogenesis was dependent or independent of CDK interaction, we compared the effect of  
185 CDC25B gain-of-function with that of a mutated form of CDC25B, CDC25BdelCDK, which is no  
186 longer able to interact with CDK1 to regulate G2 phase length (Bonnet et al. 2018). We used  
187 *in utero* electroporation at E13.5 and analyzed the fate of electroporated cells 28h later  
188 (**Figure 4A**). Compared to a GFP+ control vector, ectopically expressing CDC25B increases the  
189 number of TBR2+ cells without changing the number of aRGs (TBR2- cells in the VZ), indicating  
190 that CDC25B is sufficient to promote bIPs production (**Figure 4B-D**). Unlike WT CDC25B,  
191 ectopic expression of CDC25BdelCDK did not alter the number of TBR2+ cells (**Figure 4B-C**).

192 These results clearly show that CDC25B is sufficient to enhance bIPs production and that this  
 193 effect requires an interaction with CDK. This suggests that this control is exerted via a  
 194 modification of the duration of the G2 phase.

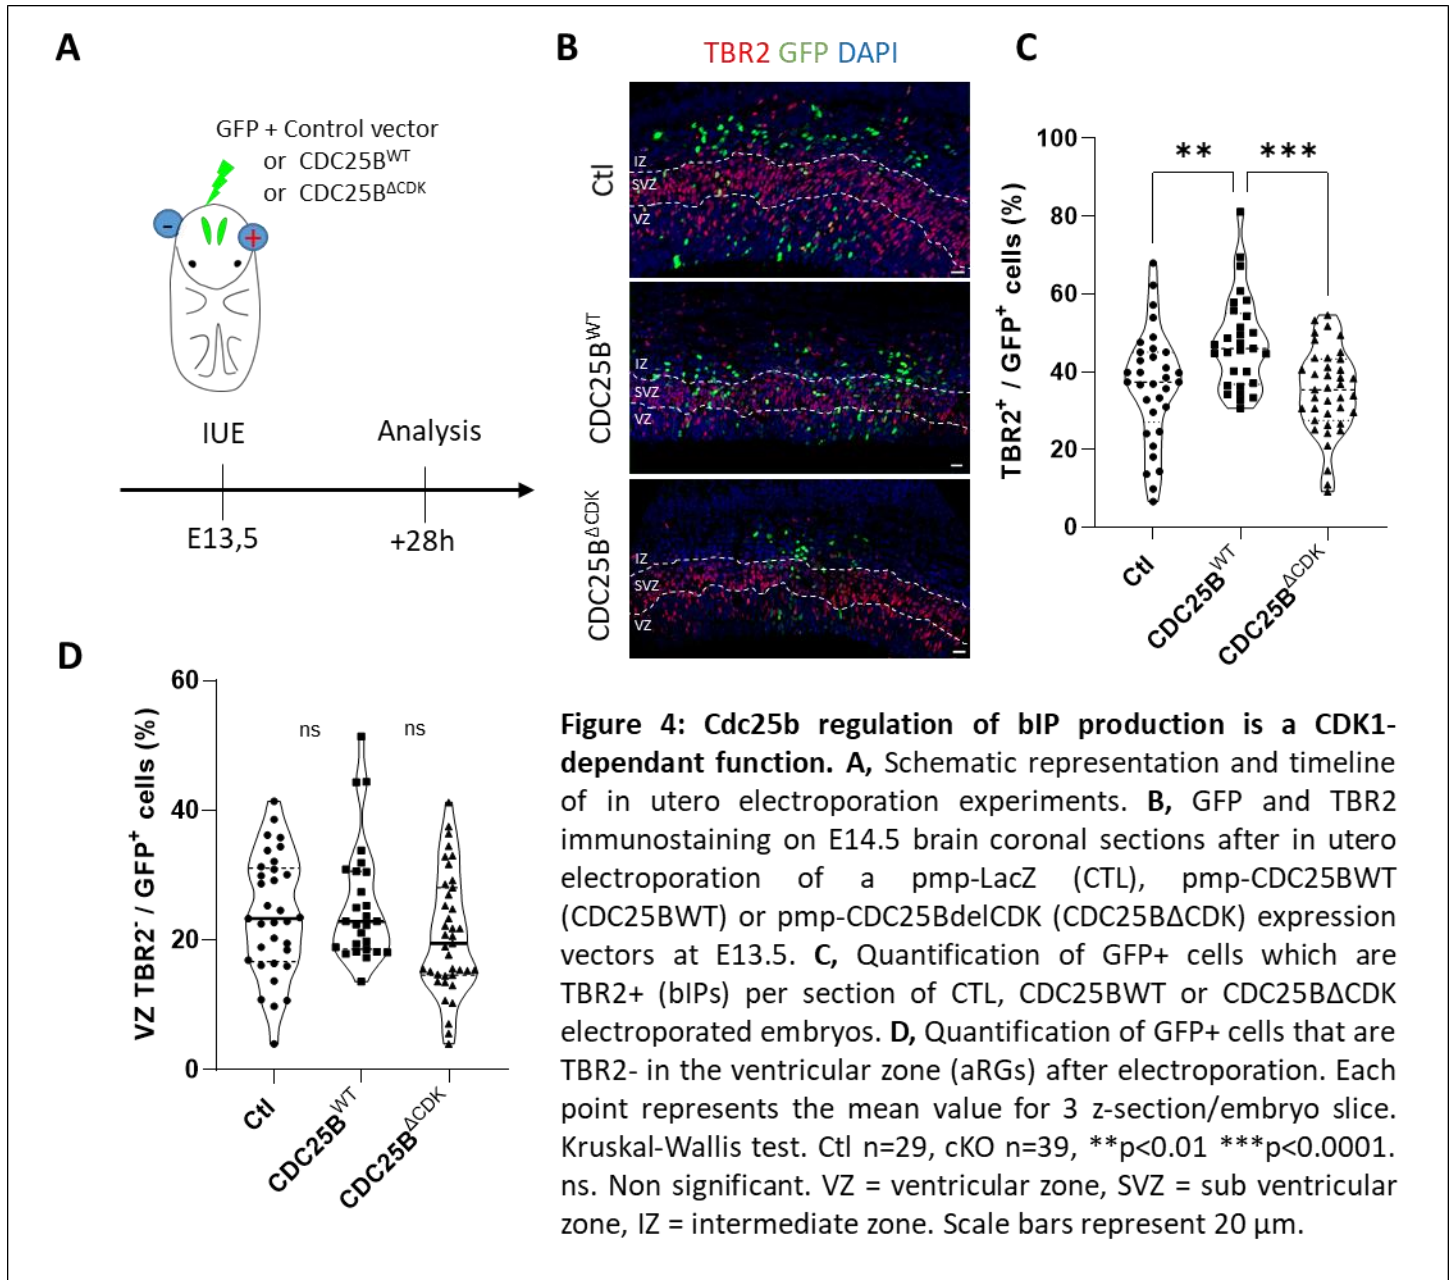

195 **Cdc25b loss-of-function severely increases the length of the G2-phase without affecting**  
 196 **the total duration of the cell cycle**

197 Knowing the role of CDC25B in the control of G2/M cell cycle phase transition, and as bIP  
 198 production involves CDC25B/CDK interaction, the defect in bIP production could be due to a  
 199 defect in cell cycle parameters in aRGs of CDC25B<sup>CKO</sup> embryos. We first measured the duration  
 200 of the G2 phase using the percentage of labeled mitoses (PLM) paradigm (Quastler and

201 Sherman 1959). Embryos were harvested 2 hrs, 3 hrs, 4 hrs (**Figure 5A**) or 6 hrs (not shown)  
 202 after EdU (5-ethynyl-2'-deoxyuridine) administration and we quantified the percentage of P-  
 203 H3<sup>+</sup>(Phospho-histone 3) EdU<sup>+</sup>/P-H3<sup>+</sup> with increasing exposure times to EdU (**Figure 5A,B**). We  
 204 found that this percentage was consistently lower in aRGs from CDC25B<sup>CKO</sup> embryos.

Figure 5

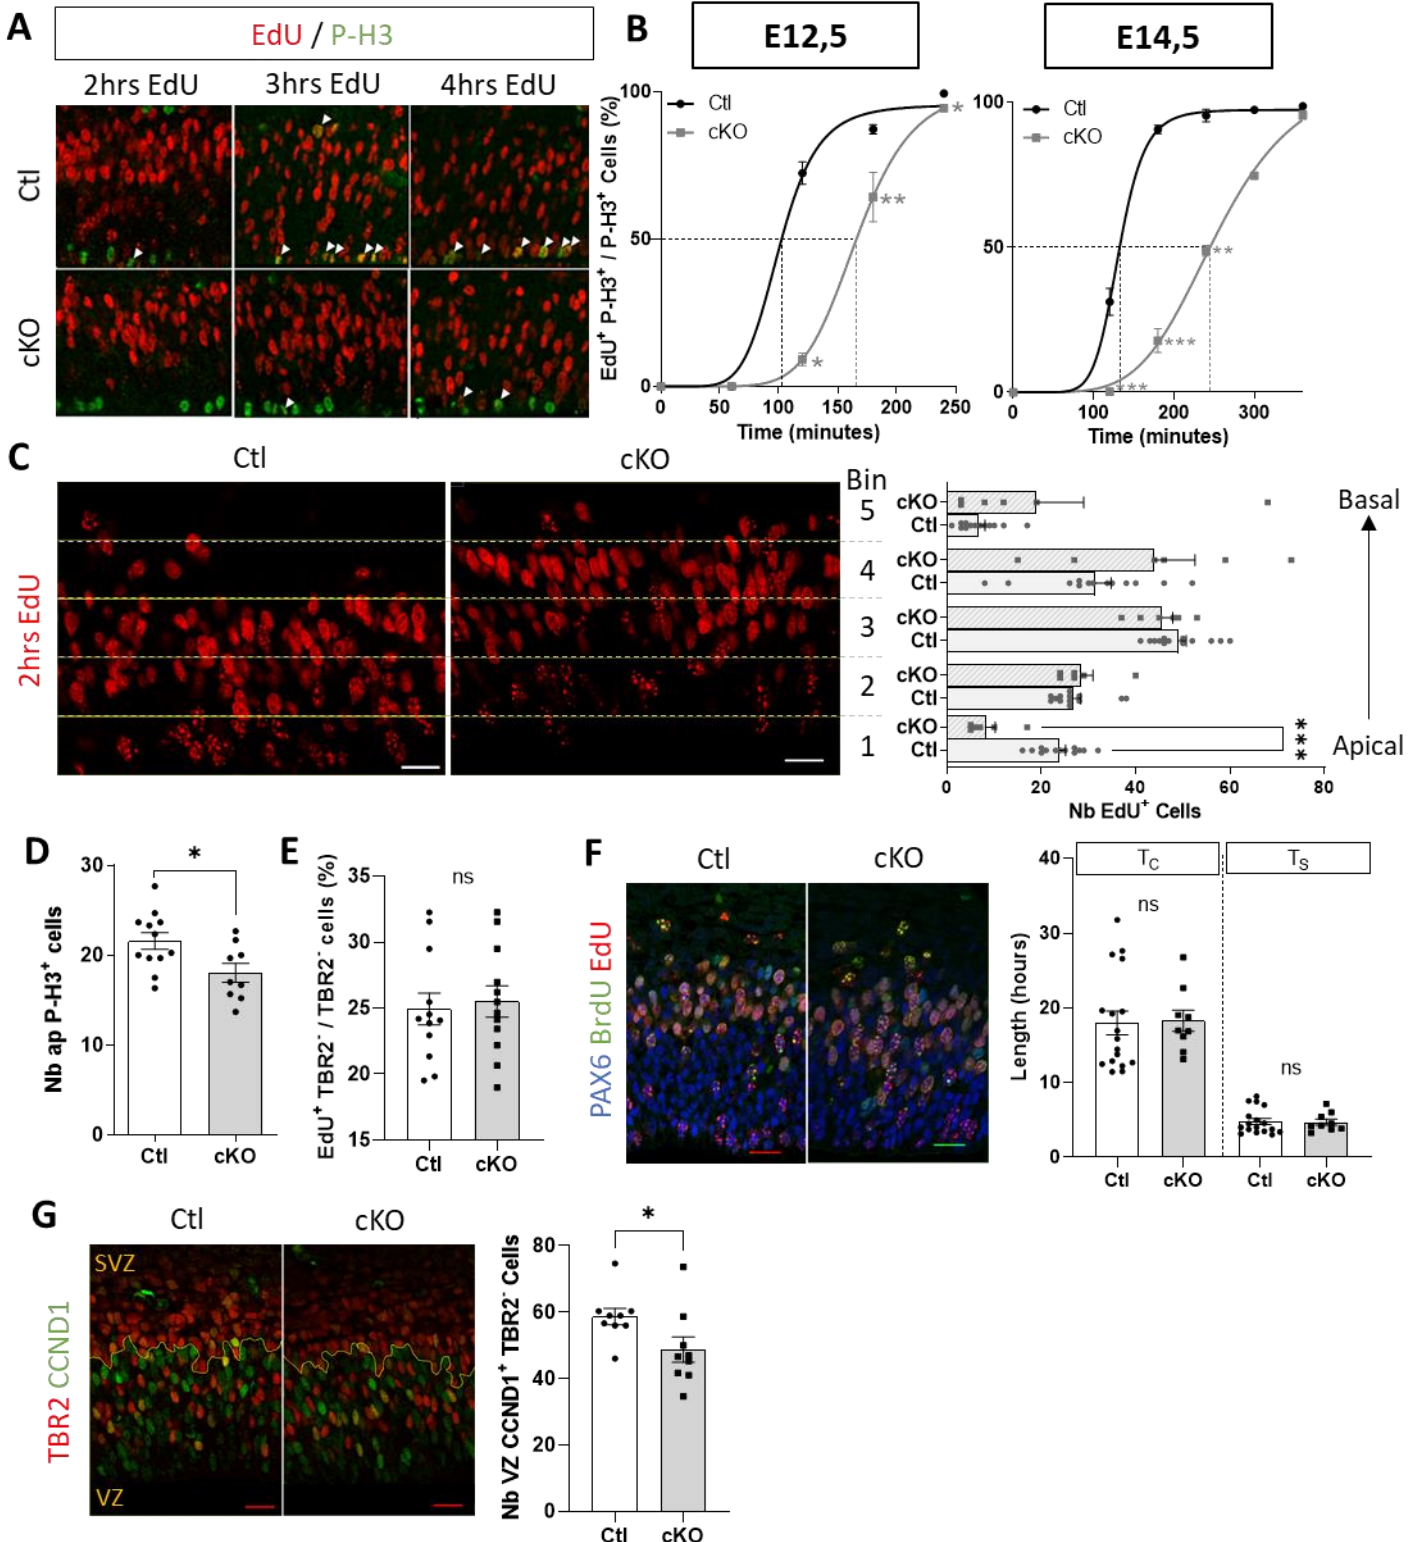

**Figure 5: Cdc25b removal strongly lengthens the G2-phase of aRG progenitors. A**, P-H3 labelling after 2, 3 and 4 hours of EdU pulse in Ctl and cKO embryos at E14.5. **B**, Quantification of the proportion of apical (aRG) EdU<sup>+</sup> P-H3<sup>+</sup> /P-H3<sup>+</sup> cells (A, arrows).  $T_{G2}$  corresponds to the time when 50% of P-H3<sup>+</sup> cells are EdU<sup>+</sup> (indicated by the dotted lines). Mann-Whitney t-test. N=2-10, \*p<0.05, \*\*p<0.01, \*\*\*p<0.0001 **C**, EdU<sup>+</sup> cell quantification after 2 hours EdU pulse, in 30  $\mu$ m high bin from apical (bin 1) to basal side (bin 5), in Ctl and cKO embryos at E14.5. Mann-Whitney t-test. N=6-13, \*\*\*p<0.0001 **D**, Quantification of apical P-H3<sup>+</sup> cells in Ctl and cKO E14.5 cortices. Mann whitney and Mixed model. n=9-12, \*p<0.05 **E**, Quantification of EdU<sup>+</sup> cells among VZ TBR2<sup>-</sup> (aRGs) cells after 1 hour EdU pulse in Ctl and cKO E14.5 embryos. Mixed model. n=12 **F**, EdU/BrdU double labelling experiments to determine total cell cycle length ( $T_C$ ) and S-phase duration ( $T_S$ ) of VZ PAX6<sup>+</sup> cells (aRG), which were calculated from counts of EdU<sup>+</sup>BrdU<sup>-</sup> and EdU<sup>+</sup>BrdU<sup>+</sup> cells as described ([Martynoga et al., 2005](#)). Bar plots represent the average length of measured  $T_C$  and  $T_S$  in aRGs of Ctl and cKO E14.5 embryos. Mann whitney and Mixed model. n=9-17 **G**, CCND1/TBR2 double immunostaining to determine the proportion of progenitor in G1-phase. Quantification of CCND1<sup>+</sup> cells among VZ TBR2<sup>-</sup> (aRGs) cells in Ctl and cKO E14.5 cortices. Mixed model. n=9, \*p<0.05. VZ = ventricular zone, SVZ = sub ventricular zone. In bar plots, each point is the mean value of 3 sections/embryo. Scale bars represent 20  $\mu$ m.

205

206 Because the progression of this percentage is proportional to the duration of the G2 phase,  
207 we were able to extract an average length of the G2 phase. Loss-of-function of *Cdc25b* in aRGs  
208 lead to a significant increase in the duration of the G2 phase at E14.5, from 2h12 hours in  
209 controls to 4h05 in CDC25B<sup>CKO</sup> (**Figure 5B, Table 1**). This lengthening is already detected at  
210 E12.5 and lasts at least until E16.5 (**Figure 5B –figure supplement 1**). In addition, we observed  
211 a strong delay in apical migration of EdU-labeled cycling progenitors (**Figure 5C**), linked to a  
212 reduction in the number of apical mitosis (P-H3 positive cells, **Figure 5D**), coherent with the  
213 G2 phase lengthening. We then determined whether this lengthening of G2 phase duration in  
214 progenitors affects their proliferation rate. We collected embryos after 1h of EdU  
215 administration at E14.5 and quantified the EdU<sup>+</sup> cells among the aRGs (VZ, TBR2<sup>-</sup> cells, **Figure**  
216 **5E**). This percentage reflects the proportion of aRGs in S phase and we did not observe any  
217 difference between Ctl and CDC25B<sup>CKO</sup> embryos (**Figure 5E**). As the rate of proliferating cell  
218 was unaffected, we next investigated whether the lengthening of the G2 phase caused a  
219 general slowdown of the total cell cycle length in aRGs. We performed dual EdU and BrdU  
220 (bromodeoxyuridine) labelling to estimate total cell cycle length ( $T_C$ ) and S phase ( $T_S$ )  
221 durations, as described in (Martynoga et al. 2005). As shown in (**Figure 5F**), nor the total cell  
222 cycle length neither  $T_S$  phase are significantly modified in aRGs of CDC25B<sup>CKO</sup> embryos. From

223 this result, we conclude that a shortening of the G1 phase duration may compensate for the  
 224 strong lengthening of the G2 phase. To confirm this hypothesis, we directly assessed the  
 225 length of the G1 phase by counting the number of cells expressing CCND1 (specifically  
 226 expressed during the G1 phase) among the aRGs. We observed a reduction in the number of  
 227 CCND1+ labelled nuclei in CDC25B<sup>CKO</sup> aRGs (**Figure 5G**) indicating that the G1 phase is shorter  
 228 in these cells.

Table 1: Cell cycle parameters in Ctl and cKO aRGs 229

| E14,5                   | T <sub>c</sub> | T <sub>s</sub> | T <sub>G2</sub> | *T <sub>G1</sub> |
|-------------------------|----------------|----------------|-----------------|------------------|
| Control                 | 17h58          | 4h47           | 2h12            | 10h29            |
| Cdc25b <sup>nesKO</sup> | 18h15          | 4h41           | 4h05            | 8h59             |
| $\Delta T$              | + 0h18         | - 0h06         | + 1h53          | - 1h30           |
| % FC                    | + 1,7%         | - 2%           | + 85%           | - 14%            |

In conclusion, the removal of CDC25B in aRGs leads to a strong lengthening of the G2 phase (85% length increase, **Table 1**) which is compensated by a shortening of the G1, resulting in a normal cell cycle length and proliferation rate. If these length

237 changes are considered in proportion to their average length, the strongest change we  
 238 observed is in the duration of the G2 phase (**Table 1**).

### 239 G2-phase shortening drives an increase in bIP production

240 As the duration of the G2 phase is almost doubled in CDC25BcKO, we next investigated  
 241 whether this lengthening could play a role in controlling the rate of bIP production. To this  
 242 end, we turned to cortical slice cultures and applied pharmacological treatments to modulate  
 243 the duration of the G2 phase. First, we treated cortical slices of E13.5 WT embryos with  
 244 PD0166285, a Wee1/Myt1 inhibitor in conditions that do not induce toxicity (**Figure 6A**)(Baffet  
 245 et al.2015). As Wee1 and Myt1 prevent mitosis entry through negatively regulating CDK1  
 246 activity (Potapova et al. 2009), their inhibition leads to an increase in CDK1 activity and thus  
 247 to a shortening of the G2 phase. We first quantified that PD0166285 treatment at 1um has an  
 248 effect on G2 length in our cultures. For that, we quantified the number of EdU+/P-H3+ cells  
 249 among the P-H3+ cells following 2h EdU incorporation just before culture arrest. The  
 250 percentage of EdU-positive cells is identical between untreated and treated controls  
 251 (approximately 22% in both conditions, not shown) indicating that the rate of proliferation is  
 252 not significantly altered by pharmacological treatment and that the cortical slices are still in a

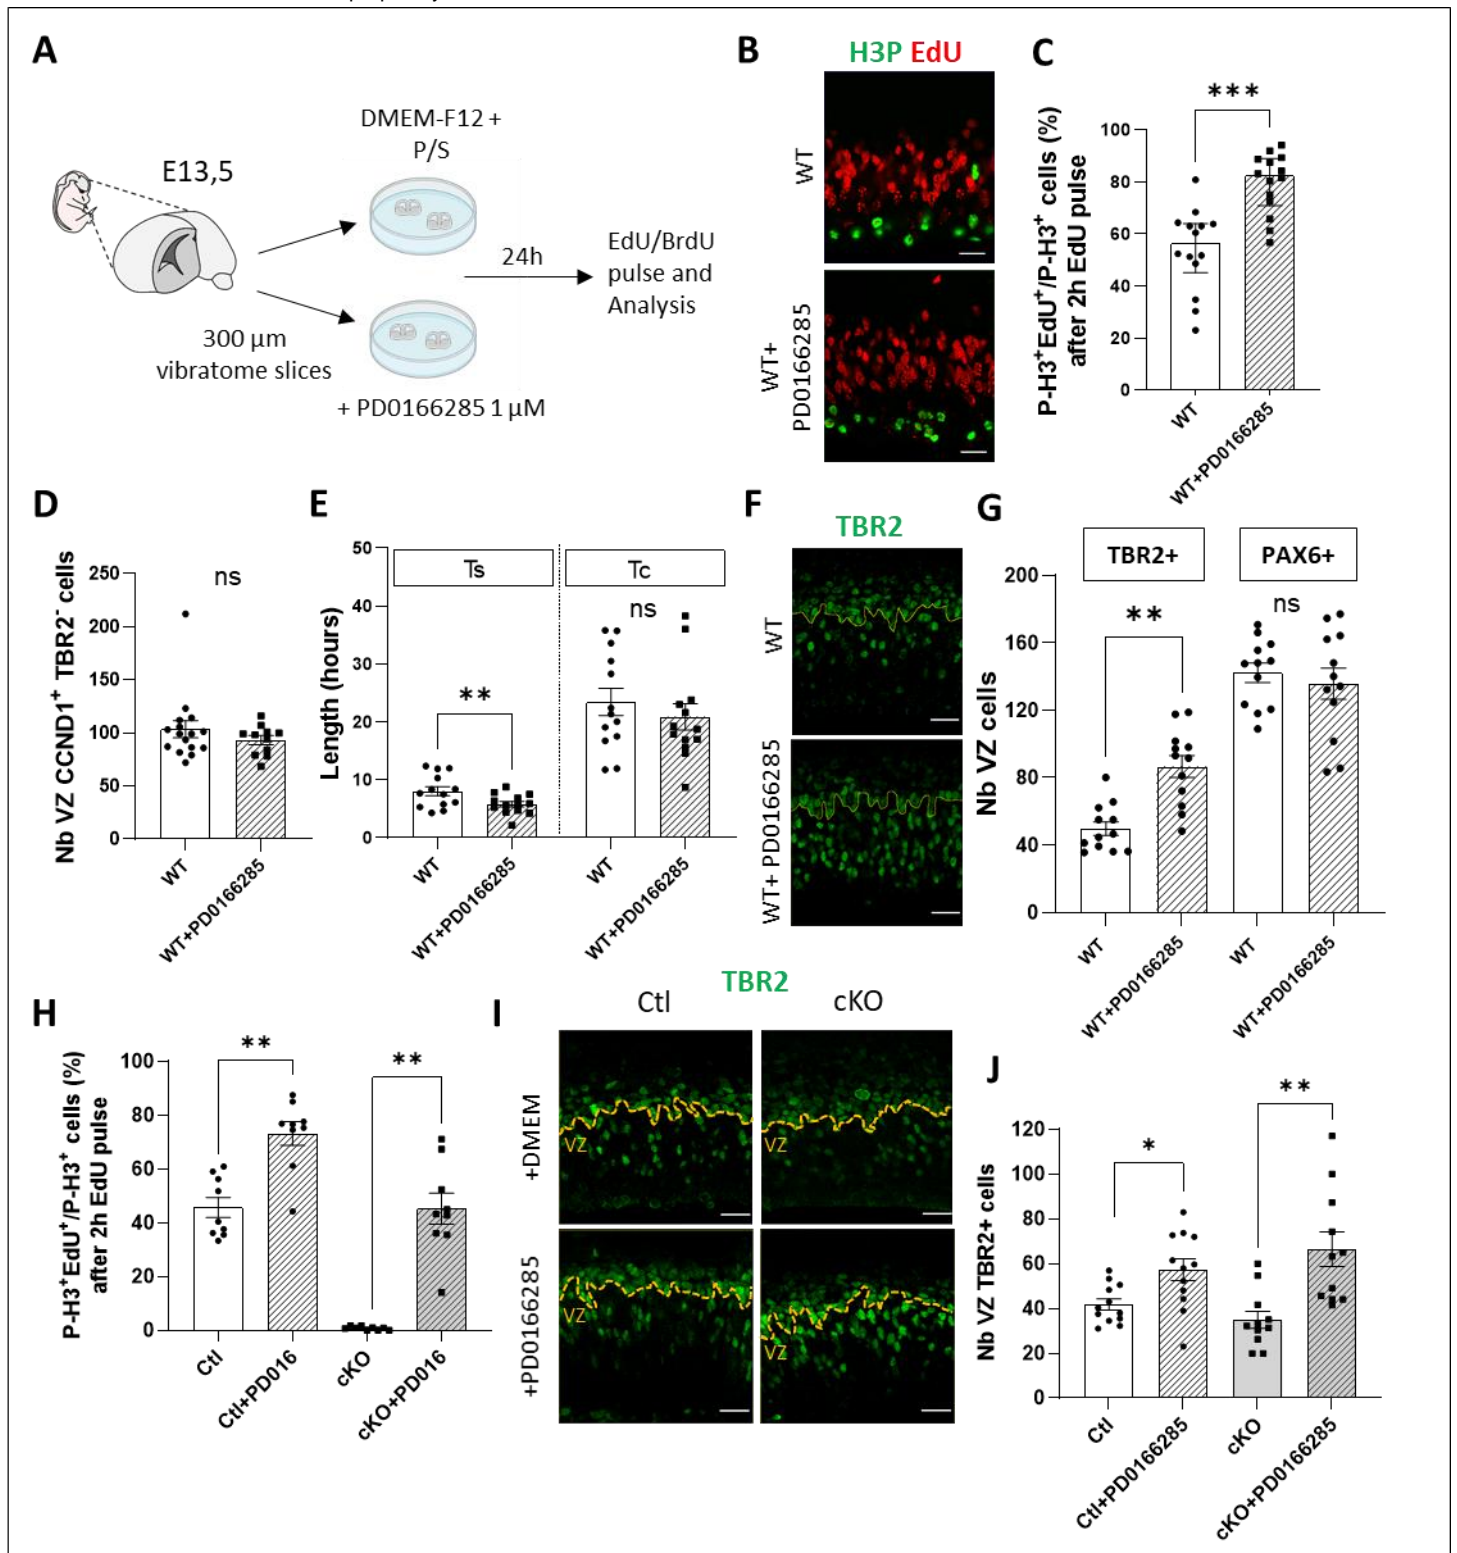

**Figure 6: G2-phase shortening triggers bIP production.** **A**, Schematic representation of embryo brain slice culture experiments. **B**, P-H3 labelling after 2h of EdU pulse in Ctl and cKO embryos at the end of the culture. **C**, Percentage of EDU<sup>+</sup>H3P<sup>+</sup>/H3P<sup>+</sup> cells following 2 h EdU pulse, in untreated and PD0166285 treated WT brain slices. Wilcoxon test. n=14, \*\*\*p<0.0001. **D**, Quantification of CCND1<sup>+</sup> TBR2<sup>-</sup> cells (aRG in G1-phase) in WT and WT+PD0166285 brain slices. Wilcoxon test. n=11-16. **E**, Total cell cycle length (T<sub>C</sub>) and S-phase duration (T<sub>S</sub>) of VZ TBR2<sup>-</sup> cells (aRGs) in WT and WT+PD0166285 brain slices. Wilcoxon test. n=13, \*\*p<0.01. **F**, TBR2 immunostaining on WT and WT+PD0166285 brain slices. **G**, Quantification of bIPs (TBR2<sup>+</sup> cells) and aRGs (TBR2<sup>-</sup> cells) in the VZ of WT and WT+PD0166285 brain slices. Wilcoxon test. n=17, \*\*p<0.01. **H**, Percentage of EDU<sup>+</sup>H3P<sup>+</sup>/H3P<sup>+</sup> cells following a 2h EdU pulse in untreated or PD0166285 treated, Ctl or cKO brain slices. Wilcoxon test. n=9, \*\*p<0.01. **I**, TBR2 immunostaining on untreated or PD0166285 treated Ctl or cKO brain slices. **J**, Quantification of TBR2<sup>+</sup> cells (bIPs) in the VZ of untreated or PD0166285 treated, Ctl or cKO brain slices. Wilcoxon test. n=9, \*p<0.05, \*\*p<0.01. Each point represents the mean value of 3 sections/embryo. VZ = ventricular zone. Scale bars represent 20 μm.

254 good physiological state at the end of the culture. We confirmed that this treatment  
255 effectively reduces the time spent in G2 phase by considering the percentage of EDU+P-H3+  
256 /P-H3+ cells in untreated and treated samples (**Figure 6B,C**). We analyzed the impact of this  
257 treatment on the duration of the G1 and S phases and on the total duration of the cell cycle.  
258 We found that S-phase is significantly reduced by PD0166285 treatment, while G1-phase  
259 duration and total cell cycle length are not significantly modified (**Figure 6D,E**). We then  
260 counted the number of TBR2+ cells in treated and untreated slices and observed that the  
261 pharmacological shortening of the G2 phase is accompanied by an increase in the number of  
262 bIPs in the VZ (**Figure 6F,G- supplement figure 1**). This indicates that PD0166285 treatment  
263 mimics the effect of CDC25B gain of function on number of TBR2+ progenitors. We then  
264 investigated whether this treatment would be sufficient to restore normal numbers of TBR2+  
265 cells in CDC25B<sup>CKO</sup> cortices. We therefore applied the same experimental protocol as above  
266 to CDC25B<sup>CKO</sup> and control littermates. As observed on WT embryos, treatment with 1uM  
267 PD0166285 led to a marked increase in EdU+P-H3+/P-H3+ cells in both control and CDC25B<sup>CKO</sup>  
268 -treated slices, indicating a shortening of the G2 phase, with the EDU+P-H3+/P-H3+ ratio in  
269 treated CDC25B<sup>CKO</sup> slices now at the level of untreated Ctl littermates (**Figure 6H**). We then  
270 checked the number of TBR2+ cells in the VZ of these treated and untreated embryos and  
271 observed a significant increase in these cells in CDC25B<sup>CKO</sup> and Ctl littermates-treated slices  
272 (**Figure 6I,J**). This indicates that shortening the G2 length in CDC25B<sup>CKO</sup> is sufficient to restore  
273 efficient bIPs production.

274 Overall, these results indicate that the duration of the G2 phase is an important parameter to  
275 control bIP production during early phases of cortical development.

276



## 277 Discussion

278 In this study, we investigated the function of CDC25B during corticogenesis. We show  
279 that removing CDC25B function lead to a transient increase in neuron numbers at early stages,  
280 accompanied with a decrease in the number of intermediate basal progenitors. This imbalance  
281 of neuron/progenitors number is due to a modification of the G2 phase length in apical  
282 progenitors. We propose a model in which CDC25B expression in aRGs, controls the switch  
283 from direct to indirect neurogenesis through a modulation of G2 phase length.

284 In the developing neocortex, neurons can be produced either directly from asymmetric  
285 division of apical progenitors or indirectly from symmetric division of intermediate basal  
286 progenitors (Govindan & Jabaudon, 2017). Controlling the balance between these two modes  
287 of production is important for the integrity and size of the cortex, but also has an impact on  
288 the type of neurons that are produced, (Haubensak et al., 2004, Attardo et al., 2008, Govindan  
289 & Jabaudon, 2017). In CDC25B<sup>CKO</sup>, we observed a specific increase of TBR1+ neurons at E13.5  
290 followed by a decrease in bIPs numbers at E14.5. Conversely, a gain of function of CDC25B at  
291 E13.5 leads to an increase in bIPs in the VZ. We can exclude that the increase in neuron  
292 production is due to an increase in aRG production because the number of aRG is not altered  
293 in CDC25B<sup>CKO</sup>. Furthermore, if this scenario were true, one would expect that there would also  
294 be more bIPs produced. This alteration in the number of bIPs and neurons is also not due to a  
295 reduction of neuron production from bIPs. Indeed, the increase in neuron production in  
296 CDC25B<sup>CKO</sup> embryos precedes the decrease in bIPs, and if bIPs differentiated into neurons  
297 prematurely, we should detect a decrease in bIPs cells in the SVZ as early as E13.5, which is  
298 not the case. Since the number of aRGs is normal and the ratio of proliferative to neurogenic  
299 division is not changed in CDC25B<sup>CKO</sup>, our results indicate a change in the progeny of  
300 asymmetrically dividing aRGs, producing neurons instead of bIPs (**Figure 7**). This phenotype is  
301 transient, as at E16.5 we no longer observe a defect in bIP numbers in the VZ and, the number  
302 of neurons is unchanged in CDC25B<sup>CKO</sup>. This could indicate either a compensation mechanism  
303 (Betty et al. 2016) or alternatively, that CDC25B is only required at early corticogenesis stages,  
304 at the time of the direct to indirect neurogenesis switch. Hence, we propose that in  
305 CDC25B<sup>CKO</sup>, the switch from direct to indirect neurogenesis is delayed, leading to a bIP/neuron  
306 production imbalance which is progressively compensated (**Figure 7**).

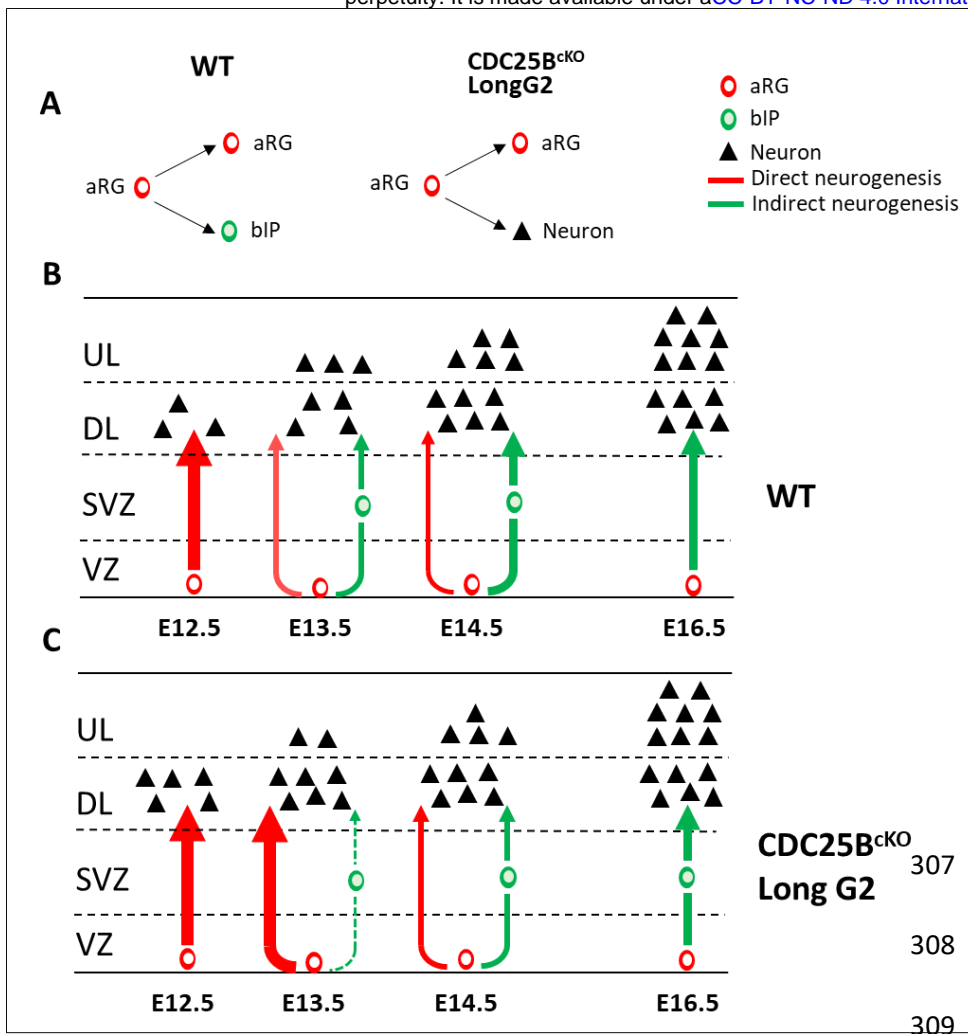

**Figure 7: Model for CDC25B function during cortical neurogenesis.** **A**, In CDC25B<sup>ckO</sup> apical progenitors asymmetric division produce a neuron instead of a basal progenitor **B**, In a normal situation, deep layer neurons are produced mainly between E12.5 and E13.5, directly from APs (direct neurogenesis). At E13.5, the production of bIPs begins in the VZ, which later divide in the SVZ to give rise to neurons (indirect neurogenesis). Indirect neurogenesis gradually becomes the main mechanism of neuron production. **C**, In CDC25B<sup>ckO</sup>, the ratio between direct and indirect neurogenesis is disturbed. Direct neurogenesis is maintained for a longer period of time, leading to an early production of deep layer neurons at the expense of the production of bIPs. This imbalance is progressively compensated to reach normal neuronal production around E16.5.

310

311 In a previous study, we have shown that CDC25B promotes neurogenesis in the  
 312 developing spinal cord by increasing neurogenic divisions at the expense of proliferative ones  
 313 (Bonnet et al. 2018). Other studies have also made indirect links between defects in the  
 314 balance between proliferative versus neurogenic division during cortical neurogenesis and  
 315 CDC25B misregulation (Gruber et al. 2011, Wu et al. 2014). We did not see any change in the  
 316 proliferative versus neurogenic mode of division in CDC25B mutant cortices. Our previous  
 317 observations made in the chicken neural tube, indicate that part of CDC25B function during  
 318 neurogenesis is independent of its function on the cell cycle (Bonnet et al. 2018). In the  
 319 neocortex, the phenotype we describe requires interaction with CDK1, but in both tissues  
 320 CDC25B appears to promote progenitor maturation.

321 Another important result is that this neurogenesis defect is linked to a strong  
 322 modification of the G2 phase length. First, in CDC25B<sup>ckO</sup>, the most important change in cell  
 323 cycle parameters in aRGs is a strong lengthening of the G2 length. Second, the gain of function

324 of CDC25BdelCDK, that cannot regulate G2 phase length (Bonnet et al. 2018) does not  
325 phenocopy the wild-type form of CDC25B that increases bIPs production, indicating that the  
326 defect in bIPs production is directly related to the ability of CDC25B to regulate CDK1 activity.  
327 Third, we provide evidence that shortening the G2 phase in WT embryos using a  
328 pharmacological treatment is sufficient to stimulate bIP production and fourth, that this  
329 treatment is sufficient to restore an efficient bIP production in CDC25B<sup>CKO</sup>. In these  
330 experiments, either the G1 phase length or the S-phase length were slightly reduced.  
331 However, the levels of change in these phases are well below the levels that have been  
332 described to result in changes in aRGS progenitor mode of division and fate (Lange et al. 2009,  
333 Pilaz et al. 2009, Arai et al. 2011) . Furthermore, the only parameter that varies strongly and  
334 significantly in both CDC25B<sup>CKO</sup> and PD0166285 treatment is the length of the G2 phase. This  
335 argues for a role for the duration of the G2 phase rather than for a role for the G1 or S phase  
336 durations in these experimental settings. In CDC25B<sup>CKO</sup>, the G2 lengthening is associated with  
337 a perturbation of the interkinetic nuclear movement as BrdU+ aRGs nuclei take more time to  
338 reach the apical surface to perform mitosis. This perturbation is likely due to the fact that INM  
339 and G2 phase processing are linked and, cell cycle progression is a prerequisite to normal INM  
340 (Ueno et al. 2006, Baffet, Hu and Vallee 2015). At later stages (E16.5), the duration of the G2  
341 phase is still greatly extended in CDC25B<sup>CKO</sup> but neuronal numbers have been compensated  
342 suggesting that G2 length modulation is important specifically at the time of the switch  
343 between direct versus indirect neurogenesis but not for later steps of neuronal production.

344       What is the relevance of this finding on the link between G2 phase length and bIP  
345 production in a normal context? Most studies in which GAP phase length has been measured  
346 indicate that while G1 phase length increases during tissue maturation, G2 phase length  
347 appears to be more stable, around 2h in aRGs and bIPs and, does not change significantly  
348 during embryonic cortex maturation (Pilaz et al. 2009, Arai et al. 2011, Hasenpusch-Theil et  
349 al. 2018). However, these studies were performed at the level of the cell population, which  
350 could have masked some heterogeneity in the duration of the G2 phase between different  
351 progenitors. Data provided using real time analysis of PCNA expressing apical progenitors  
352 show that the proportion of G2 phase in aRGs change between E12 and E16 (Fousse et al.  
353 2019). A recent study from Hagey et al. also emphasizes that cortical progenitors are not  
354 equivalent regarding G2/M phase length (Hagey et al. 2020). Indeed, by performing single cell

355 RNA seq from E9.5 to E18.5, they show that at E11.5, progenitors can be separated in two  
356 groups, one of committed progenitors, giving rise to deep layer neurons, the other one of  
357 uncommitted progenitors that will give rise to later born lineages. Interestingly, the group of  
358 committed progenitors spend more time in G1 and express G1 associated cyclin, whereas the  
359 uncommitted ones are more prone to be found in G2/M and express high levels of M-phase  
360 associated genes, including CDK1. Interestingly, data mining of this study and others (Telley et  
361 al. 2019, Hagey et al. 2020) indicate that *Cdc25B* transcripts have the same spatial and  
362 temporal profile than genes specifically expressed in the uncommitted E11.5 progenitors.  
363 Hence, CDC25B activity, by accelerating mitosis entry, could contribute to the maintenance of  
364 the uncommitted progenitor pool. Different G2 length duration, by changing the duration of  
365 exposure to instructive signaling pathways such as the Slit-Robo and/or the Notch signaling  
366 pathways (Murciano et al. 2002, Cárdenas et al. 2018, Fousse et al. 2019, Hagey et al. 2020)  
367 could lead to different fate decision after mitosis.

368 In conclusion, our study shed light on a new role for CDC25B and G2 phase length in  
369 controlling the fate of apical progenitors during early steps of corticogenesis, thus controlling  
370 the switch between direct and indirect neuronal differentiation. The apparition of indirect  
371 neurogenesis is considered a milestone of mammalian cortical evolution leading to cortical  
372 expansion (Borrell 2019). Expression of CDC25B in aRGs, by favoring bIP production, would be  
373 a way of supporting this evolutive trait. Future investigations will be necessary to understand  
374 the molecular mechanisms that support this function.

375

376

377

## 378 MATERIAL AND METHODS

### 379 Mice

380 Experiments were performed in accordance with European Community guidelines regarding  
381 care and use of animals, agreement from the Ministère de l'Enseignement Supérieur et de la  
382 Recherche number: C3155511, reference 01024.01 and CNRS recommendations. Cdc25b +/- ;  
383 Nestin-Cre, and Cdc25b flox/flox lines has been described previously (Tronche et al. 1999)  
384 (Bonnet et al. 2018). These lines were crossed to obtain conditional mutant embryo Cdc25  
385 flox/-; nestin-Cre (cKO) and control embryos Cdc25b flox/-, Cdc25b flox/+ and Cdc25b flox/+;  
386 nestin-Cre (Control). Tis21-GFP line (*Tis21<sup>-tm2(Gfp)Wb</sup>*) has been described previously  
387 (Haubensak et al., 2004). This line was crossed to obtain conditional mutant embryo Cdc25b  
388 flox/-; nestin-Cre; Tis21-GFP, that express GFP under the control of Tis21 promotor. Embryonic  
389 (E) day 0.5 was assumed to start at midday of the day of the vaginal plug.

### 390 In situ hybridization and immunohistochemistry

391 In situ hybridization were performed on 60µm vibratome sections of mouse brain embryos as  
392 described (Bonnet et al. 2018). For immunohistochemistry, embryos were fixed in 4%  
393 paraformaldehyde at 4°C overnight, washed in PBS and embedded in paraffin using an STP  
394 120 Spin Tissue Processor. Brains were sliced in 6 to 14 µm transversal sections using a HM  
395 355 Microtom. Section are directly mounted on coated histological slides. Sections were  
396 rehydrated by successive baths of histoclear (2 times), 100% ethanol (2 times), 95% ethanol,  
397 70% ethanol, 50% ethanol and deionized H<sub>2</sub>O for 5 minutes each. Sections were heated in 1%  
398 Citrate in H<sub>2</sub>O at around 100°C for 45 minutes, permeabilized with PBS-0,5% Tween + 3%  
399 Bovine Serum Albumin + 1% Horse Serum and incubated with primary antibody overnight at  
400 4°C. The following primary antibodies were used against: P-H3 (Upstate Biotechnology,  
401 1:1000, rabbit), BrdU (G3G4, 1:400, mouse), active caspase 3 (BD Biosciences, 1:100, rabbit),  
402 GFP (abcam, 1:1000, chick), CCND1 (ThermoFisher, 1:200, rabbit), SATB2 (Abcam, 1:100,  
403 mouse), TBR1 (abcam, 1:100, rabbit), PAX6 (Covance, 1:300, rabbit), PAX6 (MBL; 1:200,  
404 rabbit), TBR2 (eBioscience, 1:50, rat), RFP (SICGEN, 1:100, goat), γ-Tubulin (Exbio, 1:1000,  
405 mouse), CTIP2 (abcam, 1:200, rat). Sections were then washed in PBS and incubated with the  
406 secondary antibodies for 2h at room temperature. We counterstained the sections with DAPI

407 (1:1000, Life Technologies) to identify nuclei. For BrdU detection, we treated sections with 2N  
408 HCl and then with 0.1 M Na<sub>4</sub>B<sub>4</sub>O<sub>7</sub> before incubation with the primary antibodies.

409

410

#### 411 **Cell proliferation, cell cycle and birth dating analysis / EdU/BrdU experiments**

412 We determined G2-phase length using the percentage of labeled mitoses (PLM) paradigm  
413 (Quastler and Sherman 1959). We injected pregnant mice intraperitoneally with 100 µL of 5-  
414 ethynyl-2'-deoxyuridine (EdU, Click-iT EdU Alexa Fluor 647 Imaging Kit, Invitrogen) at 1mg/mL.  
415 Embryos were harvested 120, 180, 240, 300, 360 or 480 minutes after EdU administration and,  
416 we quantified the percentage of P-H3<sup>+</sup>EdU<sup>+</sup> co-labeled nuclei with increasing times of  
417 exposure to EdU. The progression of this percentage is proportional to G2-phase duration. To  
418 determine cell proliferation, we injected pregnant mice intraperitoneally with 1 mg/mL of  
419 EdU. Embryos were harvested 60 minutes later. Total cell cycle length and S-phase length were  
420 determined as described (Martynoga et al., 2005). We injected pregnant mice  
421 intraperitoneally with 100 µL of EdU 10 mg/mL, followed by 100µL of 5-bromo-2'-  
422 désoxyuridine (BrdU, Sigma) at 10 mg/mL 90 minutes later. Embryos were collected 30  
423 minutes later. We calculated Tc and Ts from counts of EdU<sup>+</sup>BrdU<sup>-</sup> and EdU<sup>+</sup>BrdU<sup>+</sup> cells. To  
424 determine the generation of neurons by pulse-chase experiments (birth dating), we injected  
425 pregnant mice intraperitoneally with EdU at E16,5 and we harvested embryos at birth (P0).  
426 We deduced the G1 phase length by removing the average length of G2+S+M phases from the  
427 average total cell cycle length in control and CDC25B<sup>CKO</sup> littermates.

#### 428 **Flow cytometry analysis**

429 Flow cytometry analysis were conducted as described in (Jungas et al. 2020). Cortical  
430 hemispheres were collected in PBS-1% FCS and cells mechanically dissociated through a 40-  
431 µm nylon mesh (Clearline). We suspended cells in 1.2 ml ice-cold PBS and fixed them by slowly  
432 adding 3 ml cold 100% ethanol while vortexing to obtain a 70% final concentration. The  
433 incubation procedure with primary and secondary antibodies was as described for  
434 immunofluorescence, with centrifugation at 2200 rpm for 10 min at each step. Finally, cells  
435 were resuspended in 500 µL PI/RNase solution for 30 min in the dark. Acquisition was

436 performed using cytoflexS with a minimum of 1000 cells with the Cytexpert software. We  
437 excluded debris and doublets using morphometric parameters (FSC/SSC) and pulse area  
438 parameters from PI emission, respectively. To set the threshold of PAX6, TBR2, CTIP2, SATB2  
439 and GFP-positive cells, control samples cells were incubated with secondary antibody and PI  
440 only. aRG progenitors DNA content was estimated by analyzing PI emission intensity of PAX6-  
441 positive cells only.

#### 442 **Organotypic brain slice culture and drug treatment**

443 Coronal slice of E13,5 control and CDC25B<sup>CKO</sup> embryos were sectioned at 250  $\mu\text{m}$  on a  
444 vibratome (Leica Microsystems). We deposited coronal slices on Millicell Cell Culture insert  
445 (0.4  $\mu\text{m}$ , Millipore) in culture medium DMEM-F12, 1X penicilin/streptavidin. Slices remained  
446 incubated in 5% CO<sub>2</sub> at 38°C for 24h. For drug treatment, brains slices were incubated in  
447 culture medium containing 1  $\mu\text{M}$  PD0166285 (Selleckchem).

448 To determine cell proliferation and the PLM paradigm, 250  $\mu\text{M}$  EdU was directly dropped off  
449 on each slice, for the duration required depending of the analysis (see above cell proliferation  
450 section). Brain slices were fixed 1h at room temperature in 4% paraformaldehyde, and,  
451 sectioned at 60  $\mu\text{m}$  with a vibratome before immunostaining.

#### 452 **DNA constructs and in utero electroporation**

453 *In utero* electroporation experiments were performed in cortices of E13,5 embryos inside the  
454 pregnant mother as described in (Fawal et al. 2018) . Embryos were harvested 28h later. Gain-  
455 of-function experiments were performed using a vector expressing two human Cdc25b forms  
456 hCDC25B3 (Cdc25b WT) or hCDC25B3DCDK (Cdc25b $\Delta$ ICDK) under the control of a cis  
457 regulatory element of the mouse Cdc25b called pccRE (Körner et al., 2001; (Bonnet et al.  
458 2018). A control vector was generated with the  $\beta$ Gal gene downstream of the pccRE. 1,5  $\mu\text{g}/\mu\text{L}$   
459 CDC25B or control vector was co-injected with 1  $\mu\text{g}/\mu\text{L}$  pCIG-GFP and Fast Green (Sigma) in  
460 the lateral ventricle of embryos neocortex, manually using a beveled and calibrated glass  
461 micropipette. For electroporation, five 50 ms pulses of 35 V with a 950 ms interval were  
462 delivered across the uterus with two 3-mm electrode paddles positioned on either side of the  
463 head. Before surgery, mice were subcutaneously injected with 100 $\mu\text{L}$  of morphine at 2.5  
464 mg/kg. Mice were anesthetized with 4 % isoflurane. After surgery, mice were subcutaneously  
465 injected with 100 $\mu\text{L}$  of 2 mg/ml metacam.

466

467 **Imaging and statistical analysis**

468 All the images of immunostained sections were acquired using a SP8 Leica confocal  
469 microscope. For each experiment, we analyzed at least three independent litters and three  
470 different slides per embryo. Quantitative data are expressed as mean  $\pm$  s.e.m. Statistical  
471 analysis were performed using Graph Pad Prism 9 or the RStudio software. Significance was  
472 assessed by performing Mann-Whitney (MW) t-test, Wilcoxon test or using the mixed effect  
473 model (MEM) followed by an ANOVA test as described (Bonnet et al. 2018). \*  $p < 0.05$ , \*\*  $p <$   
474  $0.01$ , \*\*\*  $p < 0.001$ , ns. non significant.

475



476 **REFERENCES**

477

- 478 Agathocleous, M., M. Locker, W. A. Harris & M. Perron (2007) A general role of hedgehog in the  
479 regulation of proliferation. *Cell Cycle*, 6, 156-9.
- 480 Agius, E., S. Bel-Vialar, F. Bonnet & F. Pituello (2015) Cell cycle and cell fate in the developing nervous  
481 system: the role of CDC25B phosphatase. *Cell Tissue Res*, 359, 201-13.
- 482 Arai, Y., J. N. Pulvers, C. Haffner, B. Schilling, I. Nusslein, F. Calegari & W. B. Huttner (2011) Neural stem  
483 and progenitor cells shorten S-phase on commitment to neuron production. *Nat Commun*, 2,  
484 154.
- 485 Attardo, A., F. Calegari, W. Haubensak, M. Wilsch-Brauninger & W. B. Huttner (2008) Live imaging at  
486 the onset of cortical neurogenesis reveals differential appearance of the neuronal phenotype  
487 in apical versus basal progenitor progeny. *PLoS ONE*, 3, e2388.
- 488 Baffet, A. D., D. J. Hu & R. B. Vallee (2015) Cdk1 Activates Pre-mitotic Nuclear Envelope Dynein  
489 Recruitment and Apical Nuclear Migration in Neural Stem Cells. *Dev Cell*, 33, 703-16.
- 490 Barbelanne, M. & W. Y. Tsang (2014) Molecular and cellular basis of autosomal recessive primary  
491 microcephaly. *Biomed Res Int*, 2014, 547986.
- 492 Benazeraf, B., Q. Chen, E. Peco, V. Lobjois, F. Medevielle, B. Ducommun & F. Pituello (2006)  
493 Identification of an unexpected link between the Shh pathway and a G2/M regulator, the  
494 phosphatase CDC25B. *Dev Biol*, 294, 133-47.
- 495 Bonnet, F., A. Molina, M. Roussat, M. Azais, S. Vialar, J. Gautrais, F. Pituello & E. Agius (2018)  
496 Neurogenic decisions require a cell cycle independent function of the CDC25B phosphatase.  
497 *Elife*, 7.
- 498 Borrell, V. (2019) Recent advances in understanding neocortical development. *F1000Res*, 8.
- 499 Boutros, R. & B. Ducommun (2008) Asymmetric localization of the CDC25B phosphatase to the mother  
500 centrosome during interphase. *Cell Cycle*, 7, 401-6.
- 501 Boutros, R., V. Lobjois & B. Ducommun (2007) CDC25B involvement in the centrosome duplication  
502 cycle and in microtubule nucleation. *Cancer Res*, 67, 11557-64.
- 503 Boutros, R., C. Lorenzo, O. Mondesert, A. Jauneau, V. Oakes, C. Dozier, B. Gabrielli & B. Ducommun  
504 (2011) CDC25B associates with a centrin 2-containing complex and is involved in maintaining  
505 centrosome integrity. *Biol Cell*, 103, 55-68.
- 506 Boutros, R., O. Mondesert, C. Lorenzo, P. Astuti, G. McArthur, M. Chircop, B. Ducommun & B. Gabrielli  
507 (2013) CDC25B overexpression stabilises centrin 2 and promotes the formation of excess  
508 centriolar foci. *PLoS ONE*, 8, e67822.
- 509 Cárdenas, A., A. Villalba, C. de Juan Romero, E. Picó, C. Kyrousi, A. C. Tzika, M. Tessier-Lavigne, L. Ma,  
510 M. Drukker, S. Cappello & V. Borrell (2018) Evolution of Cortical Neurogenesis in Amniotes  
511 Controlled by Robo Signaling Levels. *Cell*, 174, 590-606.e21.
- 512 Dehay, C. & H. Kennedy (2007) Cell-cycle control and cortical development. *Nat Rev Neurosci*, 8, 438-  
513 50.
- 514 Fawal, M. A., T. Jungas, A. Kischel, C. Audouard, J. S. Iacovoni & A. Davy (2018) Cross Talk between  
515 One-Carbon Metabolism, Eph Signaling, and Histone Methylation Promotes Neural Stem Cell  
516 Differentiation. *Cell Rep*, 23, 2864-2873.e7.
- 517 Florio, M., M. Albert, E. Taverna, T. Namba, H. Brandl, E. Lewitus, C. Haffner, A. Sykes, F. K. Wong, J.  
518 Peters, E. Guhr, S. Klemroth, K. Prüfer, J. Kelso, R. Naumann, I. Nüsslein, A. Dahl, R. Lachmann,  
519 S. Pääbo & W. B. Huttner (2015) Human-specific gene ARHGAP11B promotes basal progenitor  
520 amplification and neocortex expansion. *Science*, 347, 1465-70.
- 521 Fousse, J., E. Gautier, D. Patti & C. Dehay (2019) Developmental changes in interkinetic nuclear  
522 migration dynamics with respect to cell-cycle progression in the mouse cerebral cortex  
523 ventricular zone. *J Comp Neurol*, 527, 1545-1557.

- 524 Gonzales, K. A. & H. Liang (2015) Transcriptomic profiling of human embryonic stem cells upon cell  
525 cycle manipulation during pluripotent state dissolution. *Genom Data*, 6, 118-9.
- 526 Gonzales, K. A., H. Liang, Y. S. Lim, Y. S. Chan, J. C. Yeo, C. P. Tan, B. Gao, B. Le, Z. Y. Tan, K. Y. Low, Y. C.  
527 Liou, F. Bard & H. H. Ng (2015) Deterministic Restriction on Pluripotent State Dissolution by  
528 Cell-Cycle Pathways. *Cell*, 162, 564-79.
- 529 Govindan, S. & D. Jabaudon (2017) Coupling progenitor and neuronal diversity in the developing  
530 neocortex. *FEBS Lett*, 591, 3960-3977.
- 531 Gruber, R., Z. Zhou, M. Sukchev, T. Joerss, P. O. Frappart & Z. Q. Wang (2011) MCPH1 regulates the  
532 neuroprogenitor division mode by coupling the centrosomal cycle with mitotic entry through  
533 the Chk1-Cdc25 pathway. *Nat Cell Biol*, 13, 1325-34.
- 534 Hagey, D. W., D. Topcic, N. Kee, F. Reynaud, M. Bergsland, T. Perlmann & J. Muhr (2020) CYCLIN-B1/2  
535 and -D1 act in opposition to coordinate cortical progenitor self-renewal and lineage  
536 commitment. *Nat Commun*, 11, 2898.
- 537 Hasenpusch-Theil, K., S. West, A. Kelman, Z. Kozic, S. Horrocks, A. P. McMahon, D. J. Price, J. O. Mason  
538 & T. Theil (2018) Gli3 controls the onset of cortical neurogenesis by regulating the radial glial  
539 cell cycle through. *Development*, 145.
- 540 Haubensak, W., A. Attardo, W. Denk & W. B. Huttner (2004) Neurons arise in the basal neuroepithelium  
541 of the early mammalian telencephalon: a major site of neurogenesis. *Proc Natl Acad Sci U S A*,  
542 101, 3196-201.
- 543 Jungas, T., M. Joseph, M.-A. Fawal & A. Davy (2020) Population Dynamics and Neuronal Polyploidy in  
544 the Developing Neocortex. *Cerebral Cortex Communications*, 1.
- 545 Kawaguchi, A. (2019) Temporal patterning of neocortical progenitor cells: How do they know the right  
546 time? *Neurosci Res*, 138, 3-11.
- 547 Lange, C., W. B. Huttner & F. Calegari (2009) Cdk4/cyclinD1 overexpression in neural stem cells  
548 shortens G1, delays neurogenesis, and promotes the generation and expansion of basal  
549 progenitors. *Cell Stem Cell*, 5, 320-31.
- 550 Locker, M., M. Agathocleous, M. A. Amato, K. Parain, W. A. Harris & M. Perron (2006) Hedgehog  
551 signaling and the retina: insights into the mechanisms controlling the proliferative properties  
552 of neural precursors. *Genes Dev*, 20, 3036-48.
- 553 Madisen, L., T. A. Zwingman, S. M. Sunkin, S. W. Oh, H. A. Zariwala, H. Gu, L. L. Ng, R. D. Palmiter, M. J.  
554 Hawrylycz, A. R. Jones, E. S. Lein & H. Zeng (2010) A robust and high-throughput Cre reporting  
555 and characterization system for the whole mouse brain. *Nat Neurosci*, 13, 133-40.
- 556 Martynoga, B., H. Morrison, D. J. Price & J. O. Mason (2005) Foxg1 is required for specification of  
557 ventral telencephalon and region-specific regulation of dorsal telencephalic precursor  
558 proliferation and apoptosis. *Dev Biol*, 283, 113-27.
- 559 Molyneaux, B. J., P. Arlotta, J. R. Menezes & J. D. Macklis (2007) Neuronal subtype specification in the  
560 cerebral cortex. *Nat Rev Neurosci*, 8, 427-37.
- 561 Murciano, A., J. Zamora, J. López-Sánchez & J. M. Frade (2002) Interkinetic nuclear movement may  
562 provide spatial clues to the regulation of neurogenesis. *Mol Cell Neurosci*, 21, 285-300.
- 563 Namba, T. & W. B. Huttner (2017) Neural progenitor cells and their role in the development and  
564 evolutionary expansion of the neocortex. *Wiley Interdiscip Rev Dev Biol*, 6.
- 565 Ostrem, B., E. Di Lullo & A. Kriegstein (2017) oRGs and mitotic somal translocation - a role in  
566 development and disease. *Curr Opin Neurobiol*, 42, 61-67.
- 567 Peco, E., T. Escude, E. Agius, V. Sabado, F. Medevielle, B. Ducommun & F. Pituello (2012) The CDC25B  
568 phosphatase shortens the G2 phase of neural progenitors and promotes efficient neuron  
569 production. *Development*, 139, 1095-104.
- 570 Pilaz, L. J., J. J. McMahon, E. E. Miller, A. L. Lennox, A. Suzuki, E. Salmon & D. L. Silver (2016) Prolonged  
571 Mitosis of Neural Progenitors Alters Cell Fate in the Developing Brain. *Neuron*, 89, 83-99.
- 572 Pilaz, L. J., D. Patti, G. Marcy, E. Ollier, S. Pfister, R. J. Douglas, M. Betizeau, E. Gautier, V. Cortay, N.  
573 Doerflinger, H. Kennedy & C. Dehay (2009) Forced G1-phase reduction alters mode of division,  
574 neuron number, and laminar phenotype in the cerebral cortex. *Proc Natl Acad Sci U S A*, 106,  
575 21924-9.

- 576 Potapova, T. A., J. R. Daum, K. S. Byrd & G. J. Gorbsky (2009) Fine tuning the cell cycle: activation of the  
577 Cdk1 inhibitory phosphorylation pathway during mitotic exit. *Mol Biol Cell*, 20, 1737-48.
- 578 Quastler, H. & F. G. Sherman (1959) Cell population kinetics in the intestinal epithelium of the mouse.  
579 *Exp Cell Res*, 17, 420-38.
- 580 Telley, L., G. Agirman, J. Prados, N. Amberg, S. Fièvre, P. Oberst, G. Bartolini, I. Vitali, C. Cadilhac, S.  
581 Hippenmeyer, L. Nguyen, A. Dayer & D. Jabaudon (2019) Temporal patterning of apical  
582 progenitors and their daughter neurons in the developing neocortex. *Science*, 364.
- 583 Tronche, F., C. Kellendonk, O. Kretz, P. Gass, K. Anlag, P. C. Orban, R. Bock, R. Klein & G. Schütz (1999)  
584 Disruption of the glucocorticoid receptor gene in the nervous system results in reduced  
585 anxiety. *Nat Genet*, 23, 99-103.
- 586 Ueno, M., K. Katayama, H. Yamauchi, H. Nakayama & K. Doi (2006) Cell cycle progression is required  
587 for nuclear migration of neural progenitor cells. *Brain Res*, 1088, 57-67.
- 588 Vasistha, N. A., F. García-Moreno, S. Arora, A. F. Cheung, S. J. Arnold, E. J. Robertson & Z. Molnár (2015)  
589 Cortical and Clonal Contribution of Tbr2 Expressing Progenitors in the Developing Mouse Brain.  
590 *Cereb Cortex*, 25, 3290-302.
- 591 Wang, X., J. W. Tsai, B. LaMonica & A. R. Kriegstein (2011) A new subtype of progenitor cell in the  
592 mouse embryonic neocortex. *Nat Neurosci*, 14, 555-61.
- 593 Wilsch-Bräuninger, M., M. Florio & W. B. Huttner (2016) Neocortex expansion in development and  
594 evolution - from cell biology to single genes. *Curr Opin Neurobiol*, 39, 122-32.
- 595 Wu, X., X. Gu, X. Han, A. Du, Y. Jiang, X. Zhang, Y. Wang, G. Cao & C. Zhao (2014) A novel function for  
596 Foxm1 in interkinetic nuclear migration in the developing telencephalon and anxiety-related  
597 behavior. *J Neurosci*, 34, 1510-22.

598

599

600 SUPPLEMENTAL FIGURES

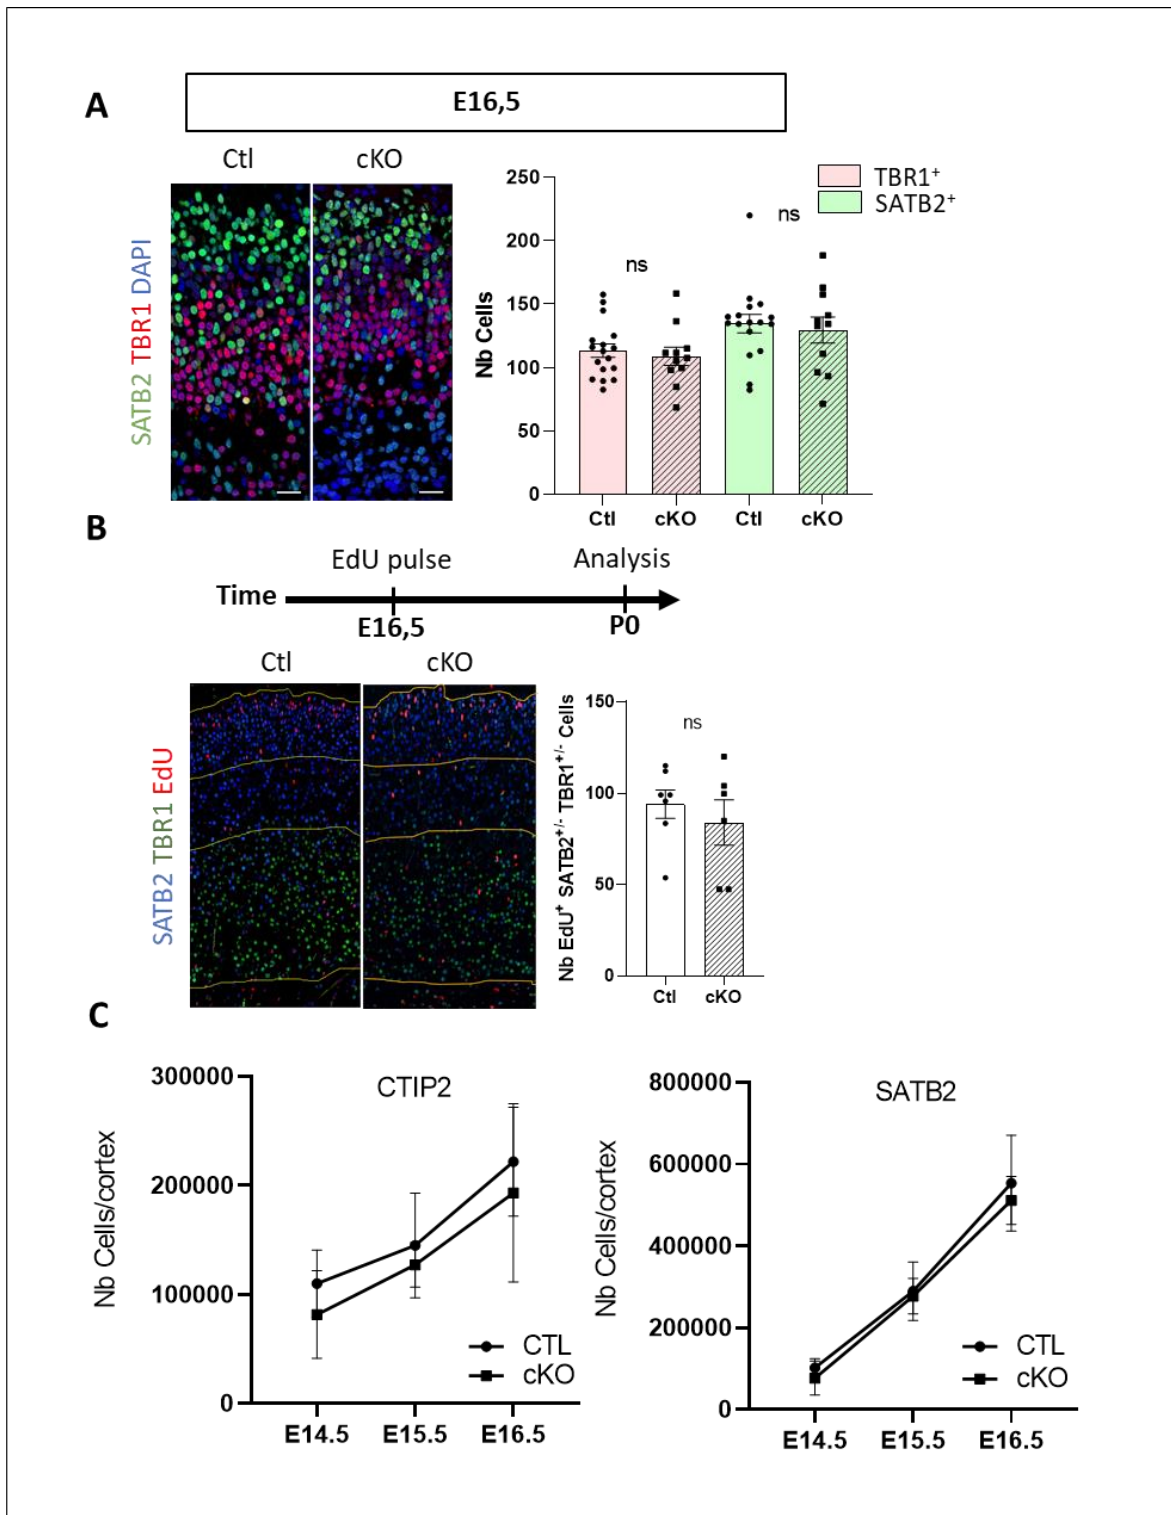

**Figure 2 – supplement 1: Neuronal production is progressively recovered in *Cdc25b* cKO embryos.** **A**, SATB2+ and TBR1+ neurons quantification in Ctrl and cKO embryos at E16.5. Each point is the mean value of 3 sections/embryo. Ctrl n= 17, cKO n= 11. Mixed model. **B**, Birth dating experiment: quantification of EdU+ cells among SATB2+ and TBR1+ neurons at P0 in Ctrl and cKO condition, following EdU pulse at E16.5. Each point represents the mean value of 3 sections/embryo. Ctrl n= 7, cKO n= 6, Mixed model. **C**, Dynamic of neuronal production in Ctrl and cKO quantified by FACS sorting of *Ctip2* and *Satb2* neurons between E14.5 to E16.5. Each point represent the mean number of cells of several embryos: E14.5, Ctrl n=6, cKO n=5; E15.5, Ctrl n= 6, cKO n=3 ; E16.5, Ctrl n=6 , cKO n=2. ns. Non significant. Scale bars represent 20  $\mu$ m

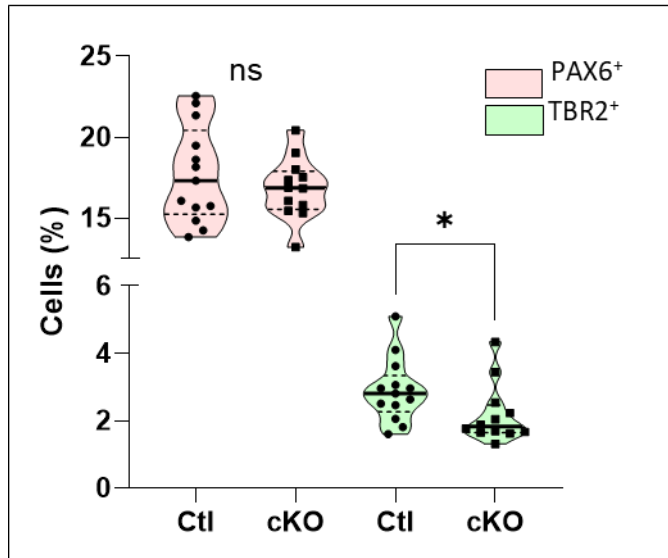

**Figure 3 – supplement 1: Validation of the reduction of TBR2 progenitors in cKO by FACS sorting.** Number of PAX6+ (aRGs) and TBR2+ (bIPs) progenitor cells in Ctl and cKO quantified by FACS sorting. The number of TBR2+ cells is significantly reduced in cKO. Flow cytometry analysis of the proportion of PAX6 + (aRGs + bRGs) and TBR2+ (bIPs) singulates cells for Ctl and cKO. Each point represents the percentage of cells for an embryo. Ctl n=13, cKO n=12 Mann-Whitney. \* p<0,05

601

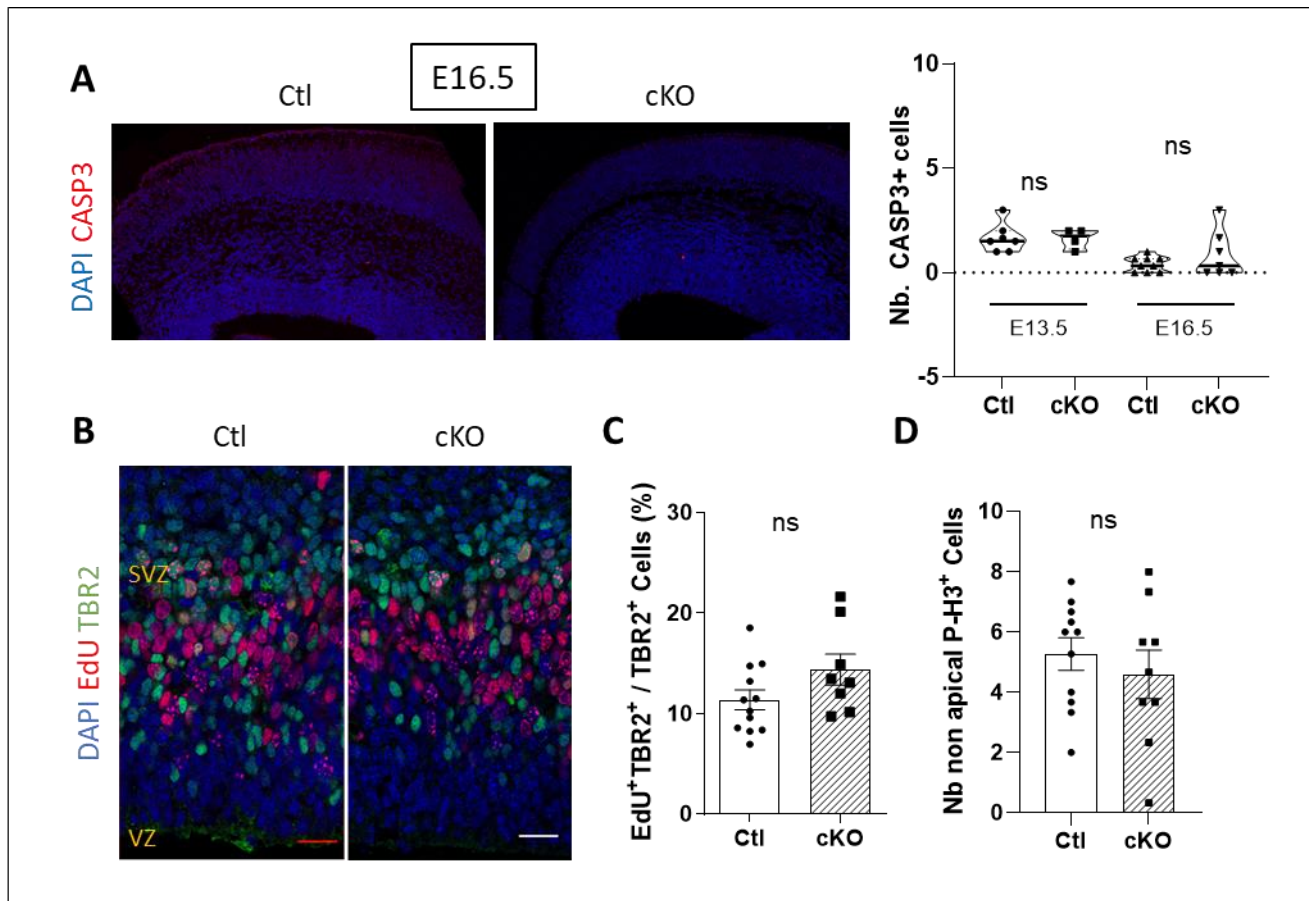

**Figure 3 – supplement 2: Reduction of bIPs cells in the VZ is not due to cell death or reduced proliferation rate** **A**, Quantification of activated CASP3+ cells on frontal brain sections of Ctl and cKO embryos at E16.5. Each point is the mean value of counting in 3 hemispheres/embryo. E13.5: Ctl n=7, cKO n=4 ; E16.5: Ctl n=9, cKO n=7 Mann Whitney. **B**, Tbr2 and EdU labelling on coronal section after 1H EdU pulse just before harvesting embryos at E14.5 **C**, Quantification of EdU+ cells among total Tbr2+ cells (bIPs) in Ctl and cKO embryos at E14.5. Ctl n= 12 , cKO n= 8. Mann Whitney. **D**, Quantification of P-H3+TBR2+ cells (non apical mitotic bIPs) in E14.5 Ctl and cKO embryos. Ctl n= 11 , cKO n= 9. Each point is the mean value of 3 sections/embryo. Mixed model. Ns, non significant. Scale bars represent 20  $\mu$ m.

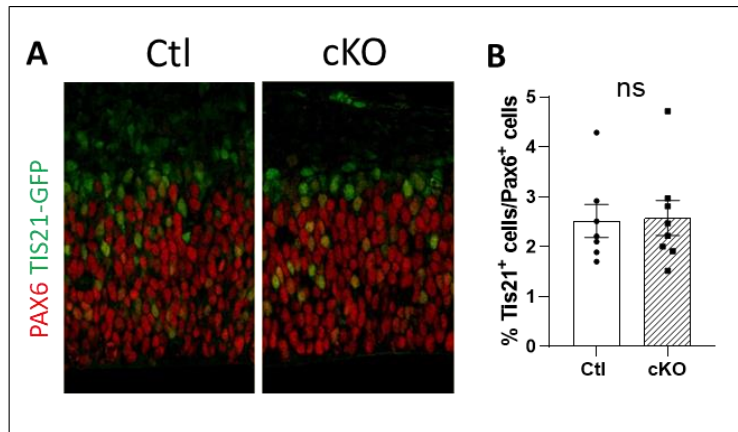

**Figure 3 – supplement 3: CDC25B does not change the division mode from proliferative to neurogenic in aRGs** **A**, PAX6 Immunostaining on brain coronal sections at E13.5 in TIS21-GFP+ Ctl or cKO embryos. **B**, Quantification of PAX6+ TIS21-GFP+ cells (differentiative aRGs) among PAX6+ cells. Each point is the mean value of 3 sections/embryo. Mixed model. ns, non significant. Scale bar is 20  $\mu$ m.

602

603

604

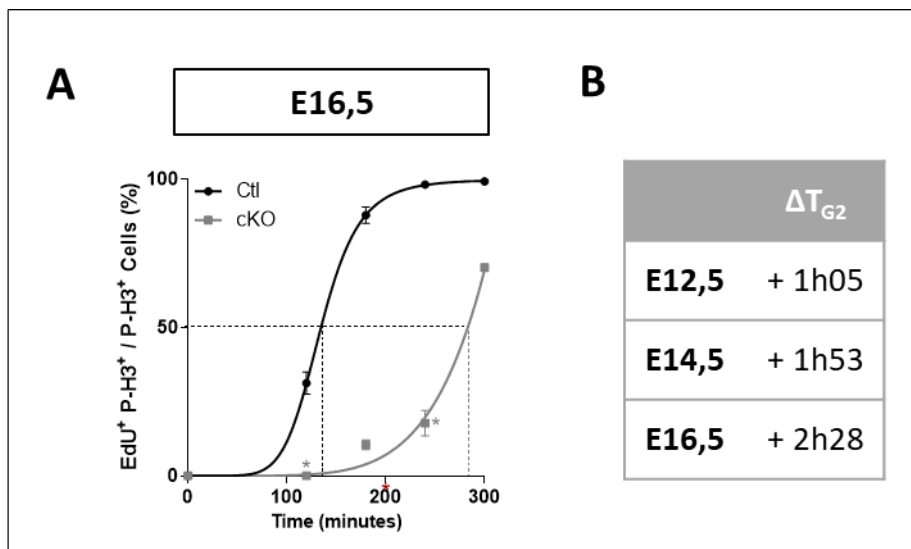

**Figure 5 – supplement 1: G2-phase length is still increased at E16.5 in cKO.** **A**, Quantification of the proportion of apical (aRG) EdU+/P-H3+ among P-H3+ cells with increasing exposure at E16.5, in Ctl and cKO embryos.  $T_{G2}$  corresponds to the time when 50% of P-H3+ cells are EdU+ (indicated by the dotted lines). Mann-Whitney test. \*  $p < 0,05$  **B**,  $T_{G2}$  difference between Ctl and cKO aRGs at E12.5, E14.5 and E16.5.

605

606

607

608

609

610

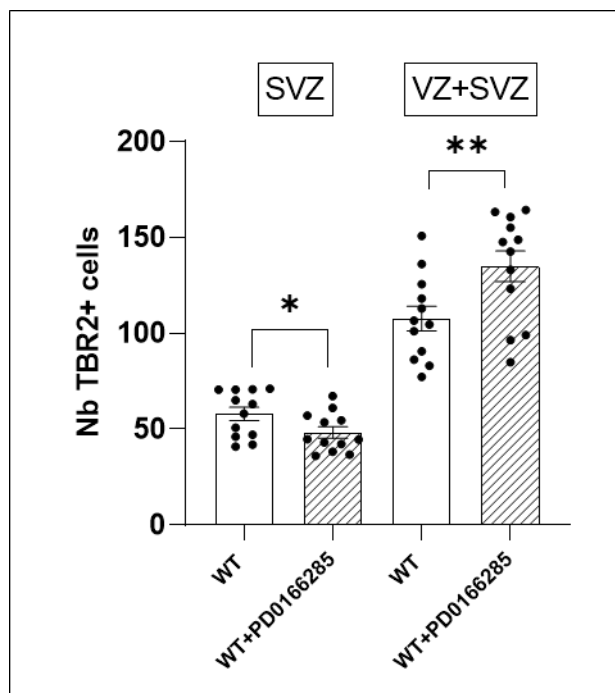

**Figure 6– supplement 1: Modification of the number of TBR2+ cells (bIPs) following PD0166285 treatment in SVZ and VZ+SVZ.** Quantification of the number of TBR2+ cells in the SVZ and VZ+SVZ in the same sections as in Figure 6F,G. (WT and WT+PD0166285 brain slices). Wilcoxon test. \*  $p < 0.05$ , \*\* $p < 0.01$ . Each point represents the mean value of 3 sections/embryo. VZ = ventricular zone. Scale bars represent 20  $\mu\text{m}$ .

611

612

613

614

615

616

617

618

619

620

621

622

623

624

625

626
